# Supplementary material for: Resistance to 6-Methylpurine is Conferred by Defective Adenine Phosphoribosyltransferase in Tetrahymena
Source: MDPI journal article supplement (doi:10.3390/genes9040179), 2018-03-23
Supplement: s1 [file s1]

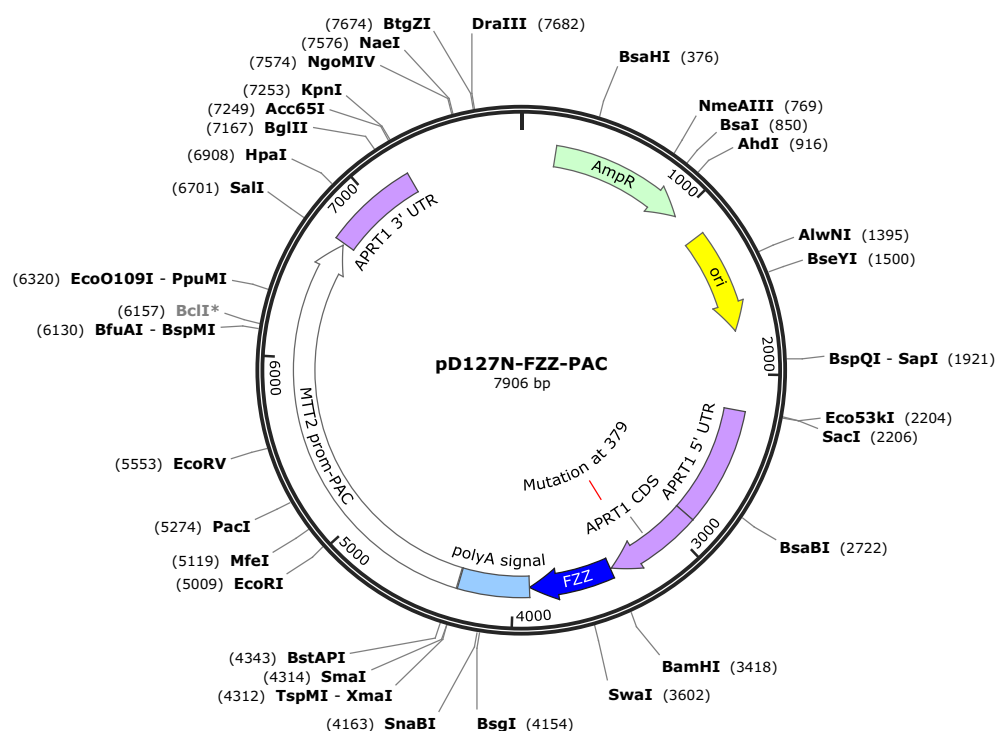

**Figure S1.** Map of the endogenous APRTase expression plasmid pD127N-FZZ-PAC, with a puromycin resistance cassette (*PAC*), FZZ tag containing polyA signal, mutated *APRT1* ORF plus 5' UTR, and 3' UTR of *APRT1*. Control plasmid carries wild-type *APRT1* instead of the mutated version.

acgt: 5' and 3' UTRs of APRT1

ACGT: APRT1 CDS

A: Mutation at 379

FZZ tag

polyA signal

MTT2 promoter-PAC cassette

GTGGCACTTTTCGGGGAAATGTGCGCGGAACCCCTATTTGTTTATTTTTCTAAATACATTCAAATA  
TGTATCCGCTCATGAGACAATAACCCTGATAAATGCTTCAATAATATTGAAAAAGGAAGAGTATGA  
GTATTCAACATTTCCGTGTCGCCCTTATTCCCTTTTTTTCGGGCATTTTGCCTTCCTGTTTTTGCTC  
ACCCAGAAACGCTGGTGAAAGTAAAAGATGCTGAAGATCAGTTGGGTGCACGAGTGGGTTACATCG  
AACTGGATCTCAACAGCGGTAAGATCCTTGAGAGTTTTCGCCCCGAAGAACGTTTTCCAATGATGA  
GCACTTTTAAAGTTCTGCTATGTGGCGCGGTATTATCCCGTATTGACGCCGGGCAAGAGCAACTCG  
GTCGCCGCATACACTATTCTCAGAATGACTTGGTTGAGTACTCACCAGTCACAGAAAAGCATCTTA  
CGGATGGCATGACAGTAAGAGAATTATGCAGTGCTGCCATAACCATGAGTGATAACACTGCGGCCA  
ACTTACTTCTGACAACGATCGGAGGACCGAAGGAGCTAACCGCTTTTTTGCACAACATGGGGGATC

ATGTAAC TCGCCTTGATCGTTGGGAACCGGAGCTGAATGAAGCCATACCAAACGACGAGCGTGACA  
CCACGATGCCTGTAGCAATGGCAACAACGTTGCGCAAAC TATTAAC TGGCGAACTACTTACTCTAG  
CTTCCCGGCAACAATTAATAGACTGGATGGAGGCGGATAAAGTTGCAGGACCACTTCTGCGCTCGG  
CCCTTCCGGCTGGCTGGTTTATTGCTGATAAATCTGGAGCCGGTGAGCGTGGGTCTCGCGGTATCA  
TTGCAGCACTGGGGCCAGATGGTAAGCCCTCCCGTATCGTAGTTATCTACACGACGGGGAGTCAGG  
CAACTATGGATGAACGAAATAGACAGATCGCTGAGATAGGTGCCTCACTGATTAAGCATTGGTAAC  
TGTCAGACCAAGTTTACTCATATATACTTTAGATTGATTTAAACTTCATTTTTTAATTTAAAGGA  
TCTAGGTGAAGATCCTTTTTGATAATCTCATGACCAAAATCCCTTAACGTGAGTTTTCGTTCCACT  
GAGCGTCAGACCCCGTAGAAAAGATCAAAGGATCTTCTTGAGATCCTTTTTTTCTGCGCGTAATCT  
GCTGCTTGCAAACAAAAAACACCGCTACCAGCGGTGGTTTGTGTTGCCGGATCAAGAGCTACCAA  
CTCTTTTTCCGAAGGTAAC TGGCTTCAGCAGAGCGCAGATACCAAATACTGTCCTTCTAGTGTAGC  
CGTAGTTAGGCCACCACTTCAAGAACTCTGTAGCACCGCCTACATACCTCGCTCTGCTAATCCTGT  
TACCAGTGGCTGCTGCCAGTGGCGATAAGTCGTGTCTTACCGGGTTGGACTCAAGACGATAGTTAC  
CGGATAAGGCGCAGCGGTTCGGGCTGAACGGGGGGTTTCGTGCACACAGCCCAGCTTGGAGCGAACGA  
CCTACACCGAACTGAGATACCTACAGCGTGAGCTATGAGAAAGCGCCACGCTTCCCGAAGGGAGAA  
AGGCGGACAGGTATCCGGTAAGCGGCAGGGTCGGAACAGGAGAGCGCACGAGGGAGCTTCCAGGGG  
GAAACGCCTGGTATCTTTATAGTCCTGTCGGGTTTCGCCACCTCTGACTTGAGCGTCGATTTTTGT  
GATGCTCGTCAGGGGGGCGGAGCCTATGGAAAAACGCCAGCAACGCGGCCTTTTTACGGTTCCTGG  
CCTTTTGCTGGCCTTTTGCTCACATGTTCTTTCTGCGTTATCCCCTGATTCTGTGGATAACCGTA  
TTACCGCCTTTGAGTGAGCTGATACCGCTCGCCGCAGCCGAACGACCGAGCGCAGCGAGTCAGTGA  
GCGAGGAAGCGGAAGAGCGCCCAATACGCAAACCGCCTCTCCCCGCGCGTTGGCCGATTCATTAAT  
GCAGCTGGCACGACAGGTTTCCCGACTGGAAAGCGGGCAGTGAGCGCAACGCAATTAATGTGAGTT  
AGCTCACTCATTAGGCACCCAGGCTTTACACTTTATGCTTCCGGCTCGTATGTTGTGTGGAATTG  
TGAGCGGATAACAATTTACACAGGAAACAGCTATGACCATGATTACGCCAAGCGCGCAATTAACC  
CTCACTAAAGGGAACAAAAGCTGGAGCTC **gagctgaatgaatgaatgaatgaatgtatttatgaat**  
**gaattaatgcaataaataataaaaataactttttataatatttagtttaaaattatatgtctact**  
**atatataaatattcttttaaactccatcttaaagacacccaaataccttagctatttattaggtttt**  
**ataacaaaaatcatttgatttttttagtttaagcaaacagtaagcaatggttttaataacaataat**  
**aattttatttatcttaaaatcaaattttattgaagattttttattcaataaattttctttattat**  
**tcgttttgagttattttatcatcctcgcttactgattttgttcaaaatatccttttattgatattaa**  
**ttgcttaaatattagagttaagctcaatattttgagtgaatttgaaaaattctgaaattattt**  
**tcatttggaatttgcttttcaagatatattctattttgtaataaaaaataaaaaatattaagacaattaa**  
**ttagaaaaatagataaatatcactctattttcaggatttgctttactttctttttgattgatttgt**  
**ggggtaataaaattaggataactaagtctgcttaatttttaataaaataaataattattgatttaca**  
**aagatatctcttaaaaaaataaattatagatagaagtgaatATGGATTACTAAAATTAAGAAATA**  
**GGTAAAGTTATTAGCGAAAACCTTCAGAAATATTCCTGATTTCCCTTAACCTGGTATTATCTTTAAA**  
**GATATTGCTCCTCTCCTCTCTAATCCTGCCATTTTTAAGCGTATTACTGATGCTTTTGTAATTGCT**  
**TTGAAGGACATTGATTTTGATAAAATTGTTATCTTAGAATCTAGAGGTTTTATTTTTGGAACCGCT**  
**ATTGGTTTACAAATGGGAAAGGGATTAATTTTAATCAGAAAGAAAGGCAAACCTACCTGGTAAGGTT**  
**GAATAATTCTCATTCGACTTAGAATACGGTAAGGATGTTTTTGAATTCAAAGTGATGCTTTAGCT**  
**AAAGGTGAAAAGTTGTTATTGTTATGATATTCTAGCTACTGGTGGAAGTCTGATGCAGCTTGC**  
**AGATTAGTTGAAAAGGTAGGAGGAGTAGTATAAGCTGTTATGTTCCCTTACCAAATTAAGGATCTT**  
**AAGGGCGAAGAAAGATTATCTAAATACAAGGTTATTAATCTTCATATTGAAGGATCCGATTACAAA**  
**GATCATGATGGTGATTACAAAGATCACGATATTGATTACAAAGATGATGATGATAAAGCTGAAAAT**

CTTTATTTTCAAGGTGCTTCTGCTCAACATGATGAAGCTGTTGATAACAAATTTAATAAGGAACAA  
CAAAATGCTTTTTACGAAATTTTACATCTTCCTAATTTAAATGAAGAACAAAGAAATGCTTTCATT  
CAATCATTAAAAGATGATCCTTCACAATCTGCTAATTTATTAGCTGAAGCTAAAAAATTAAATGAT  
GCTCAAGCTCCTAAAGTTGATAATAAATTCAACAAAGAACAACAAAACGCTTTTTATGAAATTCTT  
CATTTACCTAACCTTAATGAAGAACAAGAAACGCTTTCATTCAATCTTTAAAGGATGATCCTTCT  
CAATCTGCTAATTTACTTGCTGAAGCTAAAAAGTTAAATGGTGCTCAAGCTCCTAAGGTTGATGCT  
AATACTAGTTGAGCGAACTGAATCGGTGAGCTAAACCAACCAATCAACATAATAAACTTTATTATT  
TTTACTTAAGCATCTTACTGTTGTTGTAATAGTAGAGAAAGAAATACCCAATTAACTTCATTCACA  
TAACATTAATATCTATAAACATCTTTTTTCTCACATATATACAACCTCTCTAAATCAACAAATAACT  
TTTTTAAAAATAATGGATATATATTAACAAAATAATATATCTCTTTTTTACAAAATAGTTCATTATATA  
AATACGTATTCTGCACTCACCCGCATTTTTTCACAACAAAAACATACCAAAAAAATTCTTACTTCTA  
CATGTTTCCTTTCTTATTATTACAAAATTATTTTATAAATAGCATACAAAAATAAATACAATAAAA  
AAATAAACAAAATCCAGATCCCCCGGAAGCTTTCTAACTGTAAATGCAATCCTTGCAAATGTGCT  
GAATGCAAATGCTGATTAATCAATATTGAATTTAAACAATAAATAAATAATTAATCTATTTATTA  
TATAATAACTTAAAAATAATATCTTAACCAAATCTAAAGTATGTATTGAATATATTTTATTTAGAA  
TACATAATATAAATCTATATTTAATTGTATCCTTATTTTTTTGACTTTTTAACATCTCAACTTAT  
TCATTATATATTTTTGCTTGCATTTGCTATTTCTAATCAACAACATAACATAAATTTATTACATCTT  
GTTATTTTCATACATTCATTTTTGTTTTTTGATAGCAATAAAATATGTTTTTGTAATTTATCTAAA  
AAATGAACAAAATAAATAAATTATTTTTGTATATTTTACACTATAGACGAGCAGCGAAGTAACATA  
ATACCATCAATAATATTTTTAAAATGATTTAATTTTAATATGATATATTTATCATCAGTTTAATA  
ACATTATTTAATCATTTCTAATCATTAATATTGTTCAAAACAACCTAACTAATTTACATGATTTTG  
CAATCAACTCAATCTTTTATTTTCATATAACATACACTAAAATATGAACTCGTATTTCTTTAGAAAT  
TTTACATTTAAAAAATGTGATATATTTAACATTTTATGTGATTCGTTCAATTTATTAGTGAATTCTA  
CTTATTATACTTTTGTTTGATTAAATTGAAAACCTTGAACCTTAAGAAGAAATTCAGATGATATT  
TCTTAAGTAGATAAACAAATTTTTTAGAAAATCCTCCAATTGAATTAGTTTATTTAGGAAAGATAT  
TAAATCAAATTCATATATGATATAAAAAAGAAAAAACTCTTGAGCCTCATTTTTTAGTTTATTTTA  
CTTTGAAATAGAAATCTATTTTAAATCTTTATTGAAAATAATAAAGTGTTAACTTAATTAATA  
CTTACAAAAGAGCTTATAAGAATTAGTAAATAAATTCTACTAAAAATGGCTATATATTTATATCAA  
AAACAGTTGTTTGCTTATTAAAACCTCCTTTATAATTTTTTGACATATTTTTTTTTATCAACAATAAG  
TACTAAAAAAATAACTTCATAAAATGTCTGATTTGCTTTTTTTTTTTCTAGATCATAAATAGAATT  
AAAAATATAAAAAAATAACAAACATAAAATTACATAAATTTAATTACAGATAAATTGTTTGATTGTAA  
CAAAAAGATATCAGTAATTGTTAAAGTTAATCTGTAATACGAGAGTGATTCCCTGAGGCTCAAGAGT  
TTTTTAGAAAAATCTGATTAATTTTAATACAAATTTGCATATATAAATAATAGACCATTAACCCTA  
ATTATCATAATCAAAAATAATTAACATAAAAAATAACAAAAAACAACCTTTAAAAAATAAACA  
CAAAACAACATAAAATAAATGACTGAATATAAGCCTACTGTTAGATTAGCTACTAGAGATGATGT  
TCCTAGAGCTGTTAGAACTTTAGCTGCTGCTTTTCGCTGATTATCCTGCTACTAGACACACTGTTGA  
TCCTGATAGACACATTGAAAGAGTTACTGAATTATAAGAATTATTCTTAACTAGAGTTGGTTTAGA  
TATTGGTAAGGTTTGGGTTGCTGATGATGGTGCTGCTGTTGCTGTTTGACTACTCCTGAATCTGT  
TGAAGCTGGTGCTGTTTTTCGCTGAAATTGGTCCTAGAATGGCTGAATTATCTGGTTCTAGATTAGC  
TGCTTAATAATAAATGGAAGGTTTATTAGCTCCTCACAGACCTAAGGAACCTGCTTGGTTCTTAGC  
TACTGTTGGTGTTTCTCCTGATCACTAAGGTAAGGGTTTAGGTTCTGCTGTTGTTTTACCTGGTGT  
TGAAGCTGCTGAAAGAGCTGGTGTTCTGCTTTCTTAGAACTTCTGCTCCTAGAAATTTACCTTT  
CTATGAAAGATTAGGTTTCACTGTTACTGCTGATGTTGAAGTTCCTGAAGGTCCTAGAACTTGGTG  
TATGACTAGAAAGCCTGGTGCTTGAGATCCTTAAATTAAAAATTCAATATATATTTACAAACTTTC

ATATAAAATAAATATATTATATAAAATTAATTTTTAGTGTATTATATTAACATTAAAGCACCAAAA  
AAACGTGTTAATATACTACTATAAAATATAATTTATTCCAAATTGACTAAAATCATTATTTTACAA  
CTCATTTGTATATATATTTTATGTCAATTATTTTTTTTAACTTTCTAAAAAATAATTCCTCTTC  
ACATACATGTTAGCTCTTAAAAATTTGTCTGCAAATCCAATAATAATTTTTTTTTTGCCATTAAA  
TTTTCAAATTTTTACTGGAAAAATGCAGAAGCTTGTGCGACCTCGAGgaatgaacaagttagtttgt  
ttttgtatgaatgtgtttttatattttatggatatagtaggaattaaatttttttgatttagtaattt  
agtatgtacttcttaaagtttaaataataagatttgcattcaatttttgtaaattaagtagtttta  
tgttttttaactacataagtatttatcattgaatgtaattagttaactaaaattttttatttcaac  
atttttaaagaaagatttttactctttttgttggtattttatttattgttaaaaaggccttattaaaa  
tagattgaattataaacaacaaaagaataattaaacagaatgaataaatgatctttctatatata  
taaataatttttaatttttcattaaattttataataaaaaatttatgatattattaattgactagtta  
gctgggtatcgtatatatatcctgcttttaaggaagtctagatctattaaattttaatttaccttag  
catgaggttacttaaataattttatgtataggatgtcaaaggtcataaataaacgGGTACCCAATTC  
GCCCTATAGTGAGTCGTATTACGCGCGCTCACTGGCCGTCGTTTTACAACGTCGTGACTGGGAAAA  
CCCTGGCGTTACCCAACCTTAATCGCCTTGCAGCACATCCCCCTTTCGCCAGCTGGCGTAATAGCGA  
AGAGGCCCCGCACCGATCGCCCTTCCCAACAGTTGCGCAGCCTGAATGGCGAATGGGACGCGCCCTG  
TAGCGGCGCATTAAGCGCGGCGGGTGTGGTGGTTACGCGCAGCGTGACCGCTACACTTGCCAGCGC  
CCTAGCGCCCGCTCCTTTCGCTTTCTTCCCTTCCTTTCTCGCCACGTTGCGCCGGCTTTCCCCGTCA  
AGCTCTAAATCGGGGGCTCCCTTTAGGGTTCCGATTTAGTGCTTTACGGCACCTCGACCCCAAAA  
ACTTGATTAGGGTGATGGTTCACGTAGTGGGCCATCGCCCTGATAGACGGTTTTTCGCCCTTTGAC  
GTTGGAGTCCACGTTCTTTAATAGTGGACTCTTGTTCCAACTGGAACAACACTCAACCCTATCTC  
GGTCTATTCTTTTGATTTATAAGGGATTTTGCCGATTTGCGCCTATTGGTTAAAAAATGAGCTGAT  
TTAACAAAAATTTAACGCGAATTTTAACAAAATATTAACGCTTACAATTTAG
