# Supplementary material for: Resistance to 6-Methylpurine is Conferred by Defective Adenine Phosphoribosyltransferase in Tetrahymena
Source: MDPI journal article supplement (doi:10.3390/genes9040179), 2018-03-23
Supplement: s1 [file s1]

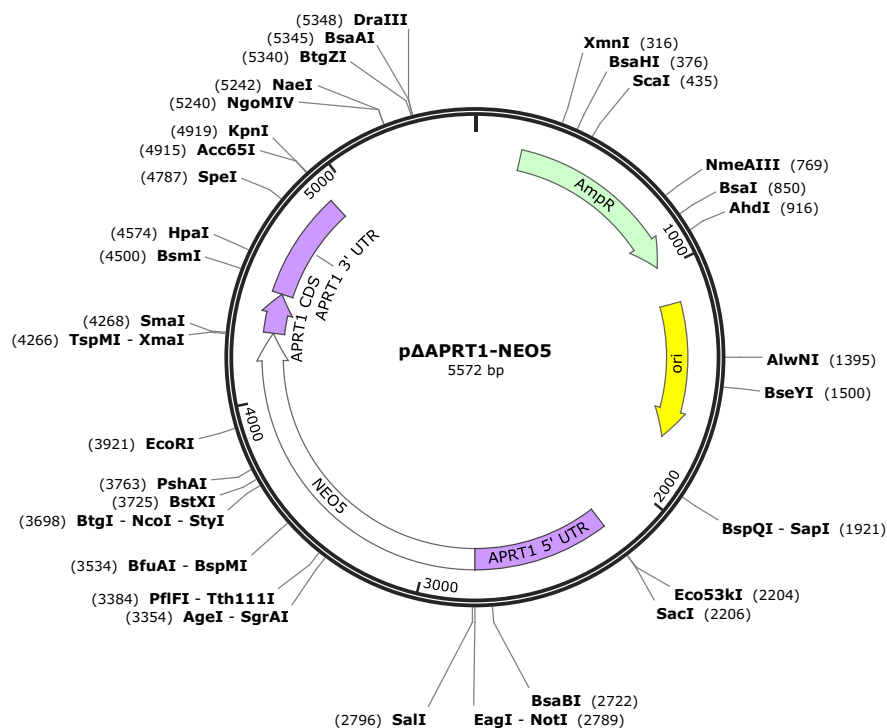

**Figure S2.** Map of the MAC *APRT1* knockout plasmid pΔAPRT1-NEO5, with paromomycin-resistance cassette (*NEO5*) and 5' and 3' flanking sequences of *APRT1*.

acgt: 5' and 3' UTRs of *APRT1*

ACTG: *APRT1* CDS

NEO5 cassette

GTGGCACTTTTCGGGGAAATGTGCGCGGAACCCCTATTTGTTTATTTTTCTAAATACATTCAAATA  
TGTATCCGCTCATGAGACAATAACCCTGATAAATGCTTCAATAATATTGAAAAAGGAAGAGTATGA  
GTATTCAACATTTCCGTGTCGCCCTTATTCCTTTTTTTCGGGCATTTTGCCTTCCTGTTTTTGCTC  
ACCCAGAAACGCTGGTGAAAGTAAAAGATGCTGAAGATCAGTTGGGTGCACGAGTGGGTTACATCG  
AACTGGATCTCAACAGCGGTAAGATCCTTGAGAGTTTTTCGCCCCGAAGAACGTTTTCCAATGATGA  
GCACTTTTAAAGTTCTGCTATGTGGCGCGGTATTATCCCGTATTGACGCCGGGCAAGAGCAACTCG  
GTCGCCGCATACACTATTCTCAGAATGACTTGGTTGAGTACTCACCAGTCACAGAAAAGCATCTTA  
CGGATGGCATGACAGTAAGAGAATTATGCAGTGCTGCCATAACCATGAGTGATAACACTGCGGCCA  
ACTTACTTCTGACAACGATCGGAGGACCGAAGGAGCTAACCGCTTTTTTGCACAACATGGGGGATC  
ATGTAACCTGCCTTGATCGTTGGGAACCGGAGCTGAATGAAGCCATACCAAACGACGAGCGTGACA  
CCACGATGCCTGTAGCAATGGCAACAACGTTGCGCAAACCTATTAACCTGGCGAAGTACTTACTCTAG  
CTTCCCGGCAACAATTAATAGACTGGATGGAGGCGGATAAAGTTGCAGGACCACTTCTGCGCTCGG  
CCCTTCCGGCTGGCTGGTTTATTGCTGATAAATCTGGAGCCGGTGAGCGTGGGTCTCGCGGTATCA  
TTGCAGCACTGGGGCCAGATGGTAAGCCCTCCCGTATCGTAGTTATCTACACGACGGGGAGTCAGG

CAACTATGGATGAACGAAATAGACAGATCGCTGAGATAGGTGCCTCACTGATTAAGCATTGGTAAC  
TGTCAGACCAAGTTTACTCATATATACTTTAGATTGATTTAAACTTCATTTTTAATTTAAAAGGA  
TCTAGGTGAAGATCCTTTTTGATAATCTCATGACCAAAATCCCTTAACGTGAGTTTTCTGTTCCACT  
GAGCGTCAGACCCCGTAGAAAAGATCAAAGGATCTTCTTGAGATCCTTTTTTTCTGCGCGTAATCT  
GCTGCTTGCAAACAAAAAACCACCGCTACCAGCGGTGGTTTGTGTTGCCGGATCAAGAGCTACCAA  
CTCTTTTTCCGAAGGTAAGTGGCTTCAGCAGAGCGCAGATACCAAATACTGTCTTCTAGTGTAGC  
CGTAGTTAGGCCACCACTTCAAGAACTCTGTAGCACCGCCTACATACCTCGCTCTGCTAATCCTGT  
TACCAGTGGCTGCTGCCAGTGGCGATAAGTCGTGTCTTACCGGGTTGGACTCAAGACGATAGTTAC  
CGGATAAGGCGCAGCGGTGCGGCTGAACGGGGGGTTCGTGCACACAGCCCAGCTTGGAGCGAACGA  
CCTACACCGAACTGAGATACCTACAGCGTGAGCTATGAGAAAGCGCCACGCTTCCCGAAGGGAGAA  
AGGCGGACAGGTATCCGGTAAGCGGCAGGGTTCGGAACAGGAGAGCGCACGAGGGAGCTTCCAGGGG  
GAAACGCCTGGTATCTTTATAGTCCTGTCGGGTTCGCCACCTCTGACTTGAGCGTCGATTTTTGT  
GATGCTCGTCAGGGGGGCGGAGCCTATGGAAAAACGCCAGCAACGCGGCCTTTTTACGGTTCCTGG  
CCTTTTGCTGGCCTTTTGCTCACATGTTCTTTCTGCGTTATCCCCTGATTCTGTGGATAACCGTA  
TTACCGCCTTTGAGTGAGCTGATACCGCTCGCCGCAGCCGAACGACCGAGCGCAGCGAGTCAGTGA  
GCGAGGAAGCGGAAGAGCGCCCAATACGCAAACCGCCTCTCCCCGCGCGTTGGCCGATTCAATTAAT  
GCAGCTGGCACGACAGGTTTCCCGACTGGAAAGCGGGCAGTGAGCGCAACGCAATTAATGTGAGTT  
AGCTCACTCATTAGGCACCCCAGGCTTTACACTTTATGCTTCCGGCTCGTATGTTGTGTGGAATTG  
TGAGCGGATAACAATTTACACAGGAAACAGCTATGACCATGATTACGCCAAGCGCGCAATTAACC  
CTCACTAAAGGGAACAAAAGCTGGAGCTCgagctgaatgaatgaatgaatgaatgtatttatgaat  
gaattaatgcaataaataataaaataataactttttataatatatttagttaaataattatatgtctact  
atatataaatattctttaaactccatcttaaagacaccaaataaccttagctatttattaggtttt  
ataacaaaaatcatttgatttttttagttaagcaacaagtaagcaatggttttaaatacaataaat  
aattttatttatcttaaaatcaaattttattgaagattttttattcaataaaattttctttattat  
tcgttttgagtattttatcatcctcgcttactgattttgttcaaaatatccttttattgatattaa  
ttgcttaaaattaattagagttaagctcaatattttgagtgaatttgaaaaattctgaaattattt  
tcatttggaatttgcttttcaagatatctattttgtaataaaaaataaaaaatattaagacaattaa  
ttagaaaaatagataaatatcactctattttcaggatttgctttaactttctttttgattgatttgt  
ggggtaataaaattGGCGGCCGCGTCGACTTGATATCTTCAAAGTATGGATTAATTATTTCAAATT  
ATTAGAAGGTAATTAATCTGCATAAATTCAAACCTATAAAAATAAAACATTAAAATTAATTCAACC  
TTATTGAAGCATCAAAATCTGAATCTCTAGAAAGACTGATTCTGATTGGATAATTTTTCGGCGCTA  
AGGATTTTGGATTAAAGAAAATTAGATTTAATTATTAATCATGATTTGAATAGGATAGCAAGAATA  
TTTGTTTGGTTTAAAGGGAAAGCGGGTAATTATCAAAAATTTATAAATAATTTTAAACAATAAA  
TAGAAAAACAAATAAGATTATAAAAACTTACAAAAATGATTGAACAAGATGGTTTACACGCTGGTT  
CTCCCGCCGCTTGGGTGCAAAGACTTTTCGGTTATGACTGGGCTCAACAAACCATCGGTTGCTCTG  
ATGCCGCCGTCTTCCGTCTTTCTGCTCAAGGTCGTCTGTCTTTTCGTCAAGACCGACCTTCTG  
GTGCCCTTAATGAACTTCAAGATGAAGCTGCCCGTCTTTCTTGGCTTGCCACCACCGGTGTTCTT  
GCGCTGCTGTCCTTGACGTTGTCACTGAAGCCGGTAGAGACTGGCTTCTTTTAGGTGAAGTCCCCG  
GTCGAGATCTTCTTTCTTCTCACCTTGCTCCTGCCGAAAAAGTTTCTATCATGGCTGATGCTATGC  
GTCGTCTTCATACCCTTGATCCCGCTACCTGCCCTTTGACCACCAAGCCAAACATCGTATCGAAC  
GTGCTCGTACTCGTATGGAAGCCGGTCTTGTCGATCAAGATGATCTTGACGAAGAACATCAAGGTC  
TTGCCCCTGCCGAACTTTTCGCCAGACTTAAGGCCCGTATGCCCGACGGTGAAGATCTTGTCGTCA  
CCCATGGTGATGCCTGCTTACCCAATATCATGGTTGAAAATGGTCGTTTTTCTGGTTTCATCGACT  
GTGGTCGTCTTGGTGTGCGCGACCGTTATCAAGATATTGCCTTAGCTACCCGTGATATCGCTGAAG

AACTTGGTGGTGAATGGGCTGACCGTTTCCTTGTCTTTACGGTATCGCCGCTCCCGATTCTCAAC  
GTATCGCCTTCTATCGTCTTCTTGACGAATTCTTCTGAGATCCTTAAATTAAAAATTCAATATATA  
TTTACAAACTTTTCATATAAAATAAATATATTATATAAAATTAATTTTTAGTGTATTATATTAACAT  
TAAAGCACCAAAAAAACGTGTTAATATACTACTATAAAATATAATTTATTCCAAATTGACTAAAAT  
CATTATTTTACAACTCATTTGTATATATATTTTATGTCAATTATTTTTTTTAACTTTCTAAAAAAA  
AAAATTCCTCTTCACATACATGTTAGCTCTTAAAAATTTGTCTGCAAATCCAATAATAATATTTTT  
TTTTGCCATTAAATTTTCAAATTTTACTGGAAAAATGCAGCCCGGGGATCAGCTCGAGGGATCT  
TAAGGGCGAAGAAAGATTATCTAAATACAAGGTTATTAATCTTCATATTGAATGAataagtgaggt  
agtgataaaaaataaaataaattgaatgaacaagttagtttgttttgtatgaatgtgttttatatt  
tatggatatagtaggaattaaattttttgatttagtaatttagtatgtacttcttaaagtttaa  
taataagatttgcattcaatttttgtaaattaagtagttttatgttttttaactacataagtat  
atcattgaatgtaattagtttaactaaaattttttatttcaacatttttaaagaaagatttttactc  
tttttgttgttattttatttattgttaaaaaggcttattaaaatagattgaattataaacaaaaaga  
ataattaaaaaacagaatgaataaatgatcttctatatatatataaatatttttaattttcattaa  
ttttataataaaaaatttatgatattattaattgactagtttagctggtatcgatatatatatcctgc  
ttttaaggaagtctagatctattaaatttttaatttaccttagcatgaggttacttaaataatttatt  
tgataggatgtcaaaggtcataaataaacgGGTACCCAATTTCGCCCTATAGTGAGTCGTATTACGC  
GCGCTCACTGGCCGTCGTTTTACAACGTCGTGACTGGGAAAACCCTGGCGTTACCCAACCTAATCG  
CCTTGCAGCACATCCCCCTTTCGCCAGCTGGCGTAATAGCGAAGAGGCCCGCACCGATCGCCCTTC  
CCAACAGTTGCGCAGCCTGAATGGCGAATGGGACGCGCCCTGTAGCGGCGCATTAAGCGCGGCGGG  
TGTGGTGGTTACGCGCAGCGTGACCGCTACACTTGCCAGCGCCCTAGCGCCCGCTCCTTTTCGCTTT  
CTTCCCTTCCTTTCTCGCCACGTTCGCCGGCTTTCCCCGTCAAGCTCTAAATCGGGGGCTCCCTTT  
AGGGTTCCGATTTAGTGCTTTACGGCACCTCGACCCCCAAAAAATTGATTAGGGTGATGGTTCACG  
TAGTGGGCCATCGCCCTGATAGACGGTTTTTTCGCCCTTTGACGTTGGAGTCCACGTTCTTTAATAG  
TGGACTCTTGTTCCAAACTGGAACAACACTCAACCCTATCTCGGTCTATTCTTTTGATTTATAAGG  
GATTTTGCCGATTTTCGGCCTATTGGTTAAAAAATGAGCTGATTTAACAAAAATTTAACGCGAATTT  
TAACAAAATATTAACGCTTACAATTTAG
