# Supplementary material for: Resistance to 6-Methylpurine is Conferred by Defective Adenine Phosphoribosyltransferase in Tetrahymena
Source: MDPI journal article supplement (doi:10.3390/genes9040179), 2018-03-23
Supplement: s1 [file s1]

ATGTAAC TCGCCTTGATCGTTGGGAACCGGAGCTGAATGAAGCCATACCAAACGACGAGCGTGACA  
CCACGATGCCTGTAGCAATGGCAACAACGTTGCGCAAAC TATTA ACTGGCGAACTACTTACTCTAG  
CTTCCCGGCAACAATTAATAGACTGGATGGAGGCGGATAAAGTTGCAGGACCACTTCTGCGCTCGG  
CCCTTCCGGCTGGCTGGTTTATTGCTGATAAATCTGGAGCCGGTGAGCGTGGGTCTCGCGGTATCA  
TTGCAGCACTGGGGCCAGATGGTAAGCCCTCCCGTATCGTAGTTATCTACACGACGGGGAGTCAGG  
CAACTATGGATGAACGAAATAGACAGATCGCTGAGATAGGTGCCTCACTGATTAAGCATTGGTAAC  
TGTCAGACCAAGTTTACTCATATATACTTTAGATTGATTTAAACTTCATTTTTTAATTTAAAGGA  
TCTAGGTGAAGATCCTTTTTGATAATCTCATGACCAAAATCCCTTAACGTGAGTTTTCGTTCCACT  
GAGCGTCAGACCCCGTAGAAAAGATCAAAGGATCTTCTTGAGATCCTTTTTTTCTGCGCGTAATCT  
GCTGCTTGCAAACAAAAAACACCGCTACCAGCGGTGGTTTGTGTTGCCGGATCAAGAGCTACCAA  
CTCTTTTTCCGAAGGTAAC TGGCTTCAGCAGAGCGCAGATACCAAATACTGTCCTTCTAGTGTAGC  
CGTAGTTAGGCCACCACTTCAAGAACTCTGTAGCACCGCCTACATACCTCGCTCTGCTAATCCTGT  
TACCAGTGGCTGCTGCCAGTGGCGATAAGTCGTGTCTTACCGGGTTGGACTCAAGACGATAGTTAC  
CGGATAAGGCGCAGCGGTTCGGGCTGAACGGGGGGTTTCGTGCACACAGCCCAGCTTGGAGCGAACGA  
CCTACACCGAACTGAGATACCTACAGCGTGAGCTATGAGAAAGCGCCACGCTTCCCGAAGGGAGAA  
AGGCGGACAGGTATCCGGTAAGCGGCAGGGTCGGAACAGGAGAGCGCACGAGGGAGCTTCCAGGGG  
GAAACGCCTGGTATCTTTATAGTCCTGTCGGGTTCGCCACCTCTGACTTGAGCGTCGATTTTTGT  
GATGCTCGTCAGGGGGGCGGAGCCTATGGAAAAACGCCAGCAACGCGGCCTTTTTACGGTTCCTGG  
CCTTTTGCTGGCCTTTTGCTCACATGTTCTTTCCTGCGTTATCCCCTGATTCTGTGGATAACCGTA  
TTACCGCCTTTGAGTGAGCTGATACCGCTCGCCGCAGCCGAACGACCGAGCGCAGCGAGTCAGTGA  
GCGAGGAAGCGGAAGAGCGCCCAATACGCAAACCGCCTCTCCCCGCGCGTTGGCCGATTCATTAAT  
GCAGCTGGCACGACAGGTTTCCCGACTGGAAAGCGGGCAGTGAGCGCAACGCAATTAATGTGAGTT  
AGCTCACTCATTAGGCACCCAGGCTTTACACTTTATGCTTCCGGCTCGTATGTTGTGTGGAATTG  
TGAGCGGATAACAATTTACACAGGAAACAGCTATGACCATGATTACGCCAAGCGCGCAATTAACC  
CTCACTAAAGGGAACAAAAGCTGGAGCTCgagctgaatgaatgaatgaatgaatgtatttatgaat  
gaattaatgcaataaataataaaaataataactttttataatatttagtttaaaattatatgtctact  
atatataaatattcttttaaactccatcttaaagacacccaaataaccttagctattttattaggtttt  
ataacaaaaatcatttgatttttttagtttaagcaaacagtaagcaatggttttaataacaataat  
aattttatttatcttaaaatcaaattttattgaagattttttattcaataaattttctttattat  
tcgttttgagttattttatcatcctcgcttactgattttgttcaaaatatccttttattgatattaa  
ttgcttaaatattagagttaagctcaatattttgagtgaatttgaaaaattctgaaattattt  
tcatttggaatttgcttttcaagatatctattttgtaataaaaaataaaaaatattaagacaattaa  
ttagaaaaatagataaatatcactctattttcaggatttgctttactttctttttgattgatttgt  
ggggtaataaaattaggataactaagtctgcttaatttttaataaaataaataattattgatttaca  
aagatatctcttaaaaaaataaattatagatagaagtgaatATGGATTACTAAAATTAAGAAATA  
GGTAAAGTTATTAGCGAAAACCTCAGAAATATTCCTGATTTCCCTTAACCTGGTATTATCTTTAAA  
GATATTGCTCCTCTCCTCTCTAATCCTGCCATTTTTAAGCGTATTACTGATGCTTTTGTAATTGCT  
TTGAAGGACATTGATTTTGATAAAATTGTTATCTTAGAATCTAGAGGTTTTATTTTTGGAACCGCT  
ATTGGTTTACAAATGGGAAAGGGATTAATTTTAATCAGAAAGAAAGGCAAACCTACCTGGTAAGGTT  
GAATAATTCTCATTCGACTTAGAATACGGTAAGGATGTTTTGAAATTCAAAGTGATGCTTTAGCT  
AAAGGTGAAAAAGTTGTTATTGTTATGATATTCTAGCTACTGGTGGAAGTCTGATGCAGCTTGC  
AGATTAGTTGAAAAGGTAGGAGGAGTAGTATAAGCTGTTATGTTCCCTTACCAAATTAAGGATCTT  
AAGGGCGAAGAAAGATTATCTAAATACAAGGTTATTAATCTTCATATTGAATGAGATCCTTAAATT  
AAAAATTCAATATATATTTACAAACTTTCATATAAAATAAATATATTATATAAAATTAATTTTTAG

TGTATTATATTAACATTAAAGCACCAAAAAAACGTGTTAATATACTACTATAAAATATAATTTATT  
CCAAATTGACTAAAATCATTATTTTACAACCTCATTTGTATATATATTTTATGTCAATTATTTTTTT  
TAACTTTTCTAAAAAAAATTCCTCTTCACATACATGTTAGCTCTTAAAAATTTGTCTGCAAATC  
CAATAATAATATTTTTTTTTTGCCATTAAATTTTCAAATTTTACTGGAAAAATGCAGCCC GGGGA  
TCAGACAATTTATTTCTAAAAATATTTAAAAATAAAAAATAATAAGGGTTTTGAATAACTCCTTT  
AATTTAAATACACATTTTTTAAATTTTTTTTAGCTCTTTAAATATTCATAAAAAATAAAAAATACTA  
ACTAAAAATAAATAAAAAAGATAATAATGATTAAAGGTATAATACTGAATAAGAAAAACATAATAG  
AGTACTTATTTTTTATATCACTATTTTTAATATCTTGAAAGCAAACTTTTTTATATATCTTAAAA  
TATATTGTATCGTTTATTCAATTATTTTCTTTAAATTTCAAATATATTGATAAAAAAGATGACATG  
TTTTTTAAAGAAAACATGAAATATAAAATAGATAAATATCAATTATTTTATTTATTAAATATATAA  
GCTGCTCAAAACATAGCTCATTCATCAATTATAATATGTGAATCATTAATTTTCAAATATTACTC  
ATTATTTAGGCTATCATTTATTTTTTATTTTCAATTATCCGTTTCTATTATATTTTAAATATTAAGT  
TGTGATTCTTGAATTTTGTGTCATGAATTATTTGTAAATCTTTTTATTTCTGATAAAAAATATAAA  
TTGATTGACTCATGATTTAAATCATGAGTCAACCTAACTAATTTTCAAATTCCTTCTATTCTAAAA  
TATAGATGTGATTCTTGAATCTCTCTTGAATATAAAGTAATTTTTTATATTTCTGATATAATTCTT  
AGCTACGTGATTCACGATTTATGCAATGATCCATATAAAATAATGTAAATAGTGTATATATATATA  
TTCGTCTTTTTTATTCCTTTATATAATTTAAAAAAATTAAAAAAATTTAATAAAGCTCTAATAAAAT  
AAATAATAACTAACTTAAACATATGGTTTCTAAGGGTGAAGAACTTTTCACTGGTGTGTTCC  
TATTTTAGTTGAATTAGATGGTGATGTTAATGGTCACAAATTTTCTGTTTCAGGTGAAGGTGAAGG  
TGATGCTACTTATGGTAAGTTAACTCTTAAATTTATTTGTACTACTGGTAAGTTACCTGTTCTTGTG  
GCCTACTTTAGTTACTACTCTTACTTATGGTGTTCAATGCTTTTCAAGATACCCTGATCACATGAA  
GCAACATGATTTCTTTAAGTCTGCTATGCCTGAAGGTTATGTTCAAGAAAGAACTATTTTCTTTAA  
AGATGATGGTAATTATAAACTAGAGCTGAAGTTAAATTTGAAGGTGATACTTTAGTTAATAGAAT  
TGAACTTAAAGGTATTGATTTCAAGGAAGATGGTAATATTCTTGGTCATAAACTTGAATATAATTA  
CAATTCTCATAATGTTTACATTATGGCTGATAAGCAAAAGAATGGTATTAAAGTTAATTTTAAAT  
TAGACATAATATTGAAGATGGTTCAGTTCAATTAGCTGATCATTATCAACAAAATACTCCTATTGG  
TGATGGTCCTGTTCTTTTACCTGATAATCACTACTTATCTACTCAATCAGCTTTATCTAAAGATCC  
TAATGAAAAAAGAGATCATATGGTTCTTTTAGAATTTGTTACTGCTGCTGGTATTACTCTTGGTAT  
GGATGAATTATATAAGGGATCCATGGACGCTCAAATTTATAAACCTTCAAGGAAAAATTCTCTCT  
AGCAGAAAGATAGAAAGAATTAGAAAAGTAGAAATCTAAATACCCAAACATGATTCCCGTCATTGT  
TGAAATTAACAAGAAGGCCAAAAACAGTTAGAGTATTGGAAAAGCAAAAGTAAACAAATTTAATAAT  
GATTTTAAAACTTTGATTAATTTATTTTCAATTTACAAAAAGGTTCTTGGTATCAAAGGATGTTAAG  
CTTCACGAATTCCAATAAACAGTTCGTAAGAAATTAGATATTACAAATGAAGCTGATGCTTTGTTC  
TTCTTTGTTGGCAATAAAAAGATTGAGAAAATAAGTAAATATTATTTTTCTTTTTTAATCAATTAT  
TTAAGTTGAATGTAGAAATTCATTCAAAAACAATCTATCTAAATAAAATGAATTCTAAAATTAAGC  
AATCAAACTTTGAATTAATTTTCATTAATTTTAAATCTTATAATTAATTAATAGATAGAACAATGA  
GCGAAATTTACCAAGAATCAAAGGATAAGGATGATGGTTTCTTATATATCACATACTCTGATCAAG  
AAGTATTTGGATCAATTACTGATTGAGCGAACTGAATCGGTCAGCTAAACCAACCAATCAACATAA  
TAACTTTTATTATTTTTTACTTAAGCATCTTACTGTTGTTGTAATAGTAGAGAAAGAAATACCCAAT  
TAACTTCATTCACATAACATTAATATCTATAAACATCTTTTTTCTCACATATATACAACTCTCTAA  
ATCAACAAATAACTTTTTTAAAAATAATGGATATATATTAACAAAATAATATATCTCTTTTTTACAAA  
ATAGTTCTTATATAAATACGTATTCTGCACTCACCCGCATTTTTTCACAACAAAACATACCAAAAA  
AATTCTTACTTCTACATGTTTCCTTTCTTATTATTACAAAATTATTTTATAAATAGCATACAAAAA  
TAAATACAATAAAAAAATAAACAAAATCCTTTTTTATTTTGAATTATTTAAACAAATATTTTCAA

TCAATCAGTCAGTCAGCATAATATTTAAAGCAACAAAACAAACCCAAGTTGTTTTTATAGTTTTTTA  
ATTGCTTTTCAGTACTATAAATAAATTTGTTATTACTTCAAGATTGATAAACTTCTTTTTTAAATT  
AAATATCTATGAATGAATAAATAAGTTGATATCTCTTTTTTAACTTGTTTTCTCTCTTTTACTTAC  
TTGCCAATTTTTTTTTTTAAATTAAAGAAATATCTTTTTATTTTTCAAAAACAAAATTTATTTTCCC  
TTGTATACAAAACCCCTTTATTTAAATAAAATCTTTATGCCCATCAATAGCCACATCTTCTCGAG  
gaatgaacaagtttagtttgtttttgatatgaatgtgttttatatttatggatatagtaggaattaa  
tttttttgatttagtaatttagtatgtacttcttaaagtttaataataagatttgcattcaattt  
ttgtaaattaagtagttttatgttttttaactacataagtatttatcattgaatgtaattagttaa  
ctaaaattttttatttcaacatttttaagaaagatttttactctttttgttgttatttatatttatt  
gttaaaaaggcttattaaaatagattgaattataaacaaaaagaataattaaaaaacagaatgaat  
aatgatctttctatatatatataaatatttttaattttcattaaattttataataaaaaatttatga  
tattattaattgactagtttagctggtatcgtatatatatcctgcttttaaggaagtctagatctat  
taaattttaatttaccttagcatgaggttacttaaatatttatattgataggatgtcaaaggtcata  
aataaacgGGTACCCAATTCGCCCTATAGTGAGTCGTATTACGCGCGCTCACTGGCCGTCGTTTTA  
CAACGTCGTGACTGGGAAAACCTGGCGTTACCCAACCTTAATCGCCTTGCAGCACATCCCCCTTTC  
GCCAGCTGGCGTAATAGCGAAGAGGCCCGCACCGATCGCCCTTCCCAACAGTTGCGCAGCCTGAAT  
GGCGAATGGGACGCGCCCTGTAGCGGCGCATTAAGCGCGGCGGGTGTGGTGGTTACGCGCAGCGTG  
ACCGCTACACTTGCCAGCGCCCTAGCGCCCGCTCCTTTCGCTTCTTCCCTTCCTTTCTCGCCACG  
TTCGCCGGCTTTCCCCGTCAAGCTCTAAATCGGGGGCTCCCTTTAGGGTTCCGATTTAGTGCTTTA  
CGGCACCTCGACCCCAAAAAACTTGATTAGGGTGATGGTTCACGTAGTGGGCCATCGCCCTGATAG  
ACGGTTTTTCGCCCTTTGACGTTGGAGTCCACGTTCTTTAATAGTGGACTCTTGTTCCAAACTGGA  
ACAACACTCAACCCTATCTCGGTCTATTCTTTTGATTTATAAGGGATTTTGCCGATTTTCGGCCTAT  
TGGTTAAAAAATGAGCTGATTTAACAAAAATTTAACGCGAATTTTAACAAAAATTTAACGCTTACA  
ATTTAG
