# Supplementary material for: Resistance to 6-Methylpurine is Conferred by Defective Adenine Phosphoribosyltransferase in Tetrahymena
Source: MDPI journal article supplement (doi:10.3390/genes9040179), 2018-03-23
Supplement: s1 [file s1]

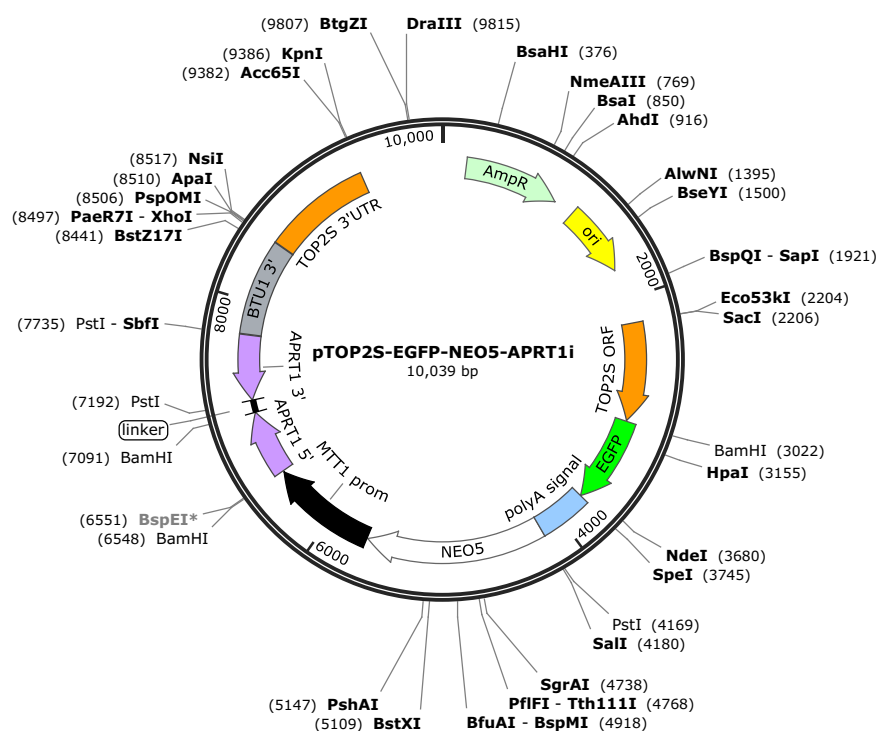

**Figure S8.** Map of trial plasmid pTOP2S-EGFP-NEO5-APRT1i. RNAi cassette and *NEO5* cassette were excised from pAPRT1i-NEO5 and then integrated into the Sall–ApaI sites of pTOP2S-EGFP-NEO4 [1].

ACGT: TOP2S ORF

acgt: TOP2S 3' UTR

3' UTR of BTU1

EGFP

polyA signal

ACGT: APRT1 CDS

NEO5 cassette

MTT1 promoter

Linker

GTGGCACTTTTCGGGGAAATGTGCGCGGAACCCCTATTTGTTTATTTTTCTAAATACATTCAAATA  
TGTATCCGCTCATGAGACAATAACCCTGATAAATGCTTCAATAATATTGAAAAAGGAAGAGTATGA  
GTATTCAACATTTCCGTGTCGCCCTTATTCCTTTTTTGCGGCATTTTGCCTTCCTGTTTTTGCTC  
ACCCAGAAACGCTGGTGAAAGTAAAAGATGCTGAAGATCAGTTGGGTGCACGAGTGGGTTACATCG  
AACTGGATCTCAACAGCGGTAAGATCCTTGAGAGTTTTCGCCCCGAAGAACGTTTTCCAATGATGA  
GCACTTTTAAAGTTCTGCTATGTGGCGCGGTATTATCCCGTATTGACGCCGGGCAAGAGCAACTCG  
GTCGCCGCATACACTATTCTCAGAATGACTTGGTTGAGTACTCACCAGTCACAGAAAAGCATCTTA

CGGATGGCATGACAGTAAGAGAATTATGCAGTGCTGCCATAACCATGAGTGATAAACACTGCGGCCA  
ACTTACTTCTGACAACGATCGGAGGACCGAAGGAGCTAACCGCTTTTTTGCACAACATGGGGGATC  
ATGTAACCTCGCCTTGATCGTTGGGAACCGGAGCTGAATGAAGCCATACCAAACGACGAGCGTGACA  
CCACGATGCCTGTAGCAATGGCAACAACGTTGCGCAAACCTATTAACCTGGCGAACTACTTACTCTAG  
CTTCCCGGCAACAATTAATAGACTGGATGGAGGCGGATAAAGTTGCAGGACCACTTCTGCGCTCGG  
CCCTTCCGGCTGGCTGGTTTATTGCTGATAAATCTGGAGCCGGTGAGCGTGGGTCTCGCGGTATCA  
TTGCAGCACTGGGGCCAGATGGTAAGCCCTCCCGTATCGTAGTTATCTACACGACGGGGAGTCAGG  
CAACTATGGATGAACGAAAATAGACAGATCGCTGAGATAGGTGCCTCACTGATTAAGCATTGGTAAC  
TGTCAGACCAAGTTTACTCATATATACTTTAGATTGATTTAAACCTTCATTTTTTAATTTAAAGGA  
TCTAGGTGAAGATCCTTTTTTGATAATCTCATGACCAAAATCCCTTAACGTGAGTTTTCGTTCCACT  
GAGCGTCAGACCCCGTAGAAAAGATCAAAGGATCTTCTTGAGATCCTTTTTTTCTGCGCGTAATCT  
GCTGCTTGCAAACAAAAAACACCGCTACCAGCGGTGGTTTGTGTTGCCGGATCAAGAGCTACCAA  
CTCTTTTTCCGAAGGTAACCTGGCTTCAGCAGAGCGCAGATACCAAATACTGTCCTTCTAGTGTAGC  
CGTAGTTAGGCCACCACTTCAAGAACTCTGTAGCACCGCCTACATACCTCGCTCTGCTAATCCTGT  
TACCAGTGGCTGCTGCCAGTGGCGATAAGTCGTGTCTTACCGGGTTGGACTCAAGACGATAGTTAC  
CGGATAAGGCGCAGCGGTCTGGGCTGAACGGGGGGTTCGTGCACACAGCCCAGCTTGGAGCGAACGA  
CCTACACCGAACTGAGATACCTACAGCGTGAGCTATGAGAAAGCGCCACGCTTCCCGAAGGGAGAA  
AGGCGGACAGGTATCCGGTAAGCGGCAGGGTCGGAACAGGAGAGCGCACGAGGGAGCTTCCAGGGG  
GAAACGCCTGGTATCTTTATAGTCCTGTCGGGTTCGCCACCTCTGACTTGAGCGTCGATTTTTGT  
GATGCTCGTCAGGGGGGCGGAGCCTATGGAAAAACGCCAGCAACGCGGCCTTTTTACGGTTCCTGG  
CCTTTTGCTGGCCTTTTGCTCACATGTTCTTTCTGCGTTATCCCCTGATTCTGTGGATAACCGTA  
TTACCGCCTTTGAGTGAGCTGATACCGCTCGCCGCAGCCGAACGACCGAGCGCAGCGAGTCAGTGA  
GCGAGGAAGCGGAAGAGCGCCCAATACGCAAACCGCCTCTCCCCGCGCGTTGGCCGATTCAATTAAT  
GCAGCTGGCACGACAGGTTTCCCGACTGGAAAGCGGGCAGTGAGCGCAACGCAATTAATGTGAGTT  
AGCTCACTCATTAGGCACCCCAGGCTTTACACTTTATGCTTCCGGCTCGTATGTTGTGTGGAATTG  
TGAGCGGATAACAATTTACACAGGAAACAGCTATGACCATGATTACGCCAAGCGCGCAATTAACC  
CTCACTAAAGGGAACAAAAGCTGGAGCTCACGCTAAGGAGCAGACCTCGAAAATGAAGAAGAGTAG  
CTGACCAAAAAAAGAGTTCTGAATGAAGGAGAACCAAAAAGTATAGCTTAAAATAAAAAATAACA  
AAAGAAATAAATGATGAAGATCTTGAATATAATTTGTTTAAGGATGAAAAGCCAAAGTAAAAAAG  
CCTCCTGCTACTGCTGCTTCAAATCAAAGAAAGTGATAAATAAAAAATGAAGATGATGATGAAGAC  
TTTAATGATGATTTTATCAGAAGATGAAAAACCAAAGAAGAAAAGGTCCAATTAACTTAATCAAAA  
ACCAAAAAATAGAAAAATGAAAGTGAAGATGAAGATTTTAATAGCAAAGAACTTGATGAAAAACCT  
AAATAAAGAAAATCTAATTCTAACTCATAAAAAGCAAGGAAACCTAAGAAAATGAGTGATGATGAG  
GGAGAAGAAGATGATGATTTTATCATACCTGATGAGGATTCTGATGAAGAAAAACCTAAGAAGAGA  
AAGAGTAATGCAACAAAACCTAAAAATAATAAAGAAGATAAAGATAATCAAAAGTCTAAAAAAAAT  
AGAACCGATTCACCAAAACCTAAAATAACAAATTCAGAAGATGAAGATGTTGCTGAATTAAAGCAA  
AATGAAGTTTTATAAACCAGAACAAGAGGTAAAAGAAACCAATTCCTCGTAAATGATCATTGAT  
AATTCTGATGAAGATTTCACTGAAGAGGAAGAATTTGGAAATAGCAAAAAGAAATCAGTAAATAGT  
AAAAGCCAAAAAAAATAAAAAGACGATGAATCATCGGATGAATGCTATTTCCGGATCCATGGTTTCT  
AAGGGTGAAGAACTTTTCACTGGTGTGTTCCCTATTTTAGTTGAATTAGATGGTGATGTTAATGGT  
CACAAATTTTCTGTTTCAGGTGAAGGTGAAGGTGATGCTACTTATGGTAAGTTAACTCTTAAATTT  
ATTTGTACTACTGGTAAGTTACCTGTTCCCTGGCCTACTTTAGTTACTACTCTTACTTATGGTGTT  
CAATGCTTTTCAAGATACCCGTGATCACATGAAGCAACATGATTTCTTTAAGTCTGCTATGCCTGAA  
GGTTATGTTCAAGAAAGAACTATTTTCTTTAAAGATGATGGTAATTATAAACTAGAGCTGAAGTT

AAATTTGAAGGTGATACTTTAGTTAATAGAATTGAACTTAAAGGTATTGATTTCAGGAAGATGGT  
AATATTCTTGGTCATAAACTTGAATATAATTACAATTCTCATAATGTTTACATTATGGCTGATAAG  
CAAAAGAATGGTATTAAAGTTAATTTTAAATTAGACATAATATTGAAGATGGTTCAGTTCAATTA  
GCTGATCATTATCAACAAAATACTCCTATTGGTGATGGTCCTGTTCTTTTACCTGATAATCACTAC  
TTATCTACTCAATCAGCTTTATCTAAAGATCCTAATGAAAAAGAGATCATATGGTTCTTTTAGAA  
TTTGTTACTGCTGCTGGTATTACTCTTGGTATGGATGAATTATATAAGACTAGTTGAGCGAACTGA  
ATCGGTCAGCTAAACCAACCAATCAACATAATAAACTTTATTATTTTTTACTTTAAGCATCTTACTGT  
TGTTGTAATAGTAGAGAAAGAAATACCCAATTAACTTCATTACATAACATTAATATCTATAAACA  
TCTTTTTTCTCACATATATACAACCTCTCTAAATCAACAAATAACTTTTTTAAAAATAATGGATATAT  
ATTAACAAAATAATATATCTCTTTTTTACAAAATAGTTCTTATATAAATACGTATTCTGCACTCACC  
CGCATTTTTTCACAACAAAACATACCAAAAAAATTCTTACTTCTACATGTTTCCTTTCTTATTATT  
ACAAAATTATTTTTATAAATAGCATACAAAATAAATACAATAAAAAAATAAACAAAATCCAGATCC  
CCCGGGCTGCAGGAATTCGATGTCGACTTGATATCTTCAAAGTATGGATTAATTATTTCAAATTAT  
TAGAAGGTAATTAATCTGCATAAATTCAAACCTATAAAAAATAAAACATTAAAATTAATTCAACCTT  
ATTGAAGCATCAAAATCTGAATCTCTAGAAAGACTGATTCTGATTGGATAATTTTTTCGGCGCTAAG  
GATTTTGGATTAAAGAAAATTAGATTTAATTATTAATCATGATTGAATAGGATAGCAAGAATATT  
TGTTTGGTTTAAAGGGAAAGCGGGTAATTATCAAAAATTTATAAATAATTTTAAACAATAAATA  
GAAAAACAAATAAGATTATAAAAACTTACAAAATGATTGAACAAGATGGTTTACACGCTGGTTCT  
CCCGCCGCTTGGGTCGAAAGACTTTTTCGGTATGACTGGGCTCAACAAACCATCGGTTGCTCTGAT  
GCCGCCGTCTTCCGTCTTTCTGCTCAAGGTCGTCCTGTTCTTTTCGTCAAGACCGACCTTTCTGGT  
GCCCTTAATGAACTTCAAGATGAAGCTGCCCGTCTTTCTTGGCTTGCCACCACCGGTGTTCCCTTGC  
GCTGCTGTCCTTGACGTTGTCACTGAAGCCGGTAGAGACTGGCTTCTTTTAGGTGAAGTCCCCGGT  
CGAGATCTTCTTTCTTCTCACCTTGCTCCTGCCGAAAAAGTTTCTATCATGGCTGATGCTATGCGT  
CGTCTTCATACCCTTGATCCCGCTACCTGCCCTTTCGACCACCAAGCCAAACATCGTATCGAACGT  
GCTCGTACTCGTATGGAAGCCGGTCTTGTCGATCAAGATGATCTTGACGAAGAACATCAAGGTCTT  
GCCCCTGCCGAACTTTTCGCCAGACTTAAGGCCCGTATGCCCGACGGTGAAGATCTTGTCGTCACC  
CATGGTGAATGACCTGCTTACCCAATATCATGGTTGAAAATGGTCGTTTTTCTGGTTTCATCGACTGT  
GGTCGTCTTGGTGTGCGCGACCGTTATCAAGATATTGCCTTAGCTACCCGTGATATCGCTGAAGAA  
CTTGGTGGTGAATGGGCTGACCGTTTTCTTGTCTTTTACGGTATCGCCGCTCCCGATTCTCAACGT  
ATCGCCTTCTATCGTCTTCTTGACGAATTCTTCTGAGATCCTTAAATTAAAAATTCAATATATATT  
TACAACTTTTCATATAAAAAATAATATATTATATAAAATTAATTTTTTAGTGTATTATATTAACATTA  
AAGCACCAAAAAACGTGTTAATATACTACTATAAAATATAATTTATTTCAAATTGACTAAAATCA  
TTATTTTACAACCTCATTTGTATATATATTTTATGTCAATTATTTTTTTTAACTTTCTAAAAAAA  
AATTCCTCTTCACATACATGTTAGCTCTTAAAAATTTGTCTGCAAATCCAATAATAATATTTTTTT  
TTGCCATTAAATTTTCAAATTTTTTACTGGAAAAATGCAGCCCCGGGGGATCAGACAATTTATTTCTA  
AAAAATATTTAAAAATAAAAAATAAAGGGTTTTGAATAACTCCTTTAATTTAAATACACATTTT  
TAAATTTTTTTTAGCTCTTTAAATATTCATAAAAAATAAAAAATACTAACTAAAAATAAATAAAAA  
GATAATAATGATTAAAGGTATAATACTGAATAAGAAAAACATAATAGAGTACTTATTTTTTTATAT  
CACTATTTTTTAATATCTTGAAAGCAAACTTTTTTTATATATCTTAAATATATTTGTATCGTTTATT  
CAATTATTTTCTTTAAATTTCAAATATATTGATAAAAAAGATGACATGTTTTTTTAAAGAAAACATG  
AAATATAAAATAGATAAATATCAATTATTTTATTTATTAATATATAAGCTGCTCAAAACATAGCT  
CATTCAATTAATAATATGTGAATCATTAATTTTCAAATATTAATCATTATTTAGGCTATCATT  
TATTTTTTTATTTTCAATTATCCGTTTCTATTATATTTTAAATATTAAGTTGTGATTCTTGAATTTTG  
TGTCATGAATTATTTGTAAATCTTTTTATTTCTGATAAAAAATAAATTGATTGACTCATGATTT

AAATCATGAGTCAACCTAACTAATTTTCAAATTCCTTCTATTCTAAAATATAGATGTGATTCTTGA  
ATCTCTCTTGAATATAAAGTAATTTTTTATATTTCTGATATAATTCTTAGCTACGTGATTCACGAT  
TTATGCAATGATCCATATAAAATAATGTAAATAGTGTATATATATATATTCGTCTTTTTTTATTCTT  
TATATAATTTAAAAAAATTAAAAAAATTTAATAAAGCTCTAATAAAATAAATAATAACTAACT  
TAAACATCCCGGGGGATCCGGATTACTAAAATTAAGAAATAGGTAAAGTTATTAGCGAAAACCTTCA  
GAAATATTCCTGATTTCCCTTAACCTGGTATTATCTTTAAAGATATTGCTCCTCTCCTCTCTAATC  
CTGCCATTTTTAAGCGTATTACTGATGCTTTTGTAATTGCTTTGAAGGACATTGATTTTGATAAAA  
TTGTTATCTTAGAATCTAGAGGTTTTATTTTTGGAACCGCTATTGGTTTACAAATGGGAAAGGGAT  
TAATTTTAATCAGAAAGAAAGGCAAACCTACCTGGTAAGGTTGAATAATTCTCATTCGACTTAGAAT  
ACGGTAAGGATGTTTTTGAAATTCAAAGTGATGCTTTAGCTAAAGGTGAAAAGTTGTTATTGTTG  
ATGATATTCTAGCTACTGGTGGAACCTGCTGATGCAGCTTGCAGATTAGTTGAAAAGGTAGGAGGAG  
TAGTATAAGCTGTTATGTTCTTTACCAAATTAAGGATCTTAAGGGCGAAGAAAGATTATCTAAAT  
ACAAGGTTATTAATCTTCATATTGAATGGATCCGTAAGTAACGGATATGCAAAAGtaaacaatt  
ttaggcttttataaaaaataggaagcaggccggcgTAGATAAAAGAAGAATTCAAAGGCTGCAGC  
ATTCAATATGAAGATTAATAACCTTGTATTTAGATAATCTTTCTTCGCCCTTAAGATCCTTAATTT  
GGTAAAGGAACATAACAGCTTATACTACTCCTCTACCTTTTCAACTAATCTGCAAGCTGCATCAG  
CAGTTCACCAGTAGCTAGAATATCATCAACAATAACAACCTTTTTCACCTTTAGCTAAAGCATCAC  
TTTGAATTTCAAAAACATCCTTACCGTATTCTAAGTCGAATGAGAATTATTCAACCTTACCAGGTA  
GTTTGCCTTTCTTTCTGATTAAATTAATCCCTTTCCCATTTGTAAACCAATAGCGGTTCCAAAA  
TAAAACCTCTAGATTCTAAGATAACAATTTTATCAAAATCAATGTCCTTCAAAGCAATTACAAAAG  
CATCAGTAATACGCTTAAAAATGGCAGGATTAGAGAGGAGAGGAGCAATATCTTTAAAGATAATAC  
CAGGTTAAGGGAAATCAGGAATATTTCTGAAGTTTTCGCTAATAACTTTACCTATTTCTTAATTTT  
AGTAATCCCTGCAGGCGAACTGAATCGGTCAGCTAAACCAACCAATCAACATAATAAACTTTATTA  
TTTTTACTTAAGCATCTTACTGTTGTTGTAATAGTAGAGAAAGAAATACCCAATTAACCTTCATTCA  
CATAACATTAATATCTATAAACATCTTTTTTCTCACATATATACAACCTCTCTAAATCAACAAATAA  
CTTTTTTAAAAATAATGGATATATATTAACAAAATAATATATCTCTTTTTTACAAAATAGTTCTTATA  
TAAATACGTATTCTGCACTCACCCGCATTTTTCACAACAAAAACATACCAAAAAAATTCTTACTTC  
TACATGTTTCCTTTCTTATTATTACAAAATTATTTTATAAATAGCATACAAAAATAAATACAATAA  
AAAAATAAACAAAAATCCTTTTTTTATTTTGAATTATTTTAAACAAATATTTTCAATCAATCAGTCAG  
TCAGCATAATATTAAAGCAACAAACAAACCAAGTTGTTTTTATAGTTTTTTAATTGCTTTTCAG  
TACTATAAATAAATTTGTTATTACTTCAAGATTGATAAACTTCTTTTTTTAAATTAAATATCTATGA  
ATGAATAAATAAGTTGATATCTCTTTTTTAACCTGTTTTCTCTTTTACTTACTTGCCAATTTTTT  
TTTTTAAATTAAAGAAATATCTTTTTATTTTTCAAAAACAAAATTTATTTTCCCTTGTATACAAA  
ACCCCTTTATTTAAATAAAATCTTTATGCCCATCAATAGCCACATCTTCTCGAGGGGGGGGCCcat  
gcattcattcaatcaatcaatcacactcagctttaataatttaaaaagatatccgcaaatttta  
gaatttaagttggtaaaaaagttatcaaatttgcaatatttctattgatttatatatttatcaa  
tcagtcaatgctgacgatgtaatttaaaagatgtgttggttttctagattatttaactaattatt  
aatatttaagaaatttttaaaaattttgaaatttattaaaagtttaaaatttggttaaaaaataatt  
aaaaaattaaagtaaaagaaaaataaaaaatgatagacaattagaatataggaagtgcgacgaat  
tagatatattatgaaccaggaacttcaggcgatgaaaatattttatatagtttgatttgtaatagg  
ttaaataagatatagcttaaatcttttcaattctaaaataggaaatcattagctacttgaaaagaa  
actttaatacattaaatgattaggttttaggagctagaaaaaagctatcctcaacatttatgaaa  
aactatctgaaagctaatttgctatttctggaagtaaaaattatctctttagaaactcaaatcaag  
ctaaattatttcatttttgcaaataatttaagtggtttctcaatagatcatggttaagttcaataa

ataattattataatgttttttcggatagagcagagaagattagagaataactctatcaaaattatttc  
tgagtaatttttattaattttaattgctatgttttttaataaatgttttgaattcagattattgt  
ccaaatgtgatgatatgtaacctttcttaccttatgtgatatctattgtttgtgagagagttaatt  
gccaagaccGGTACCCAATTGCGCCCTATAGTGAGTCGTATTACGCGCGCTCACTGGCCGTCGTTTT  
ACAACGTCGTGACTGGGAAAACCCCTGGCGTTACCCAACCTTAATCGCCTTGCAGCACATCCCCCTTT  
CGCCAGCTGGCGTAATAGCGAAGAGGCCCCGCACCGATCGCCCTTCCCAACAGTTGCGCAGCCTGAA  
TGGCGAATGGGACGCGCCCTGTAGCGGCGCATTAAGCGCGGCGGGTGTGGTGGTTACGCGCAGCGT  
GACCGCTACACTTGCCAGCGCCCTAGCGCCCGCTCCTTTCGCTTTCTTCCCTTCCTTCTCGCCAC  
GTTTCGCCGGCTTTCCCCGTCAAGCTCTAAATCGGGGGCTCCCTTTAGGGTTCCGATTTAGTGCTTT  
ACGGCACCTCGACCCCAAAAACTTGATTAGGGTGATGGTTCACGTAGTGGGCCATCGCCCTGATA  
GACGGTTTTTTCGCCCTTTGACGTTGGAGTCCACGTTCTTTAATAGTGGACTCTTGTTCCAAACTGG  
AACAACACTCAACCCTATCTCGGTCTATTCTTTTGATTTATAAGGGATTTTGCCGATTTTCGGCCTA  
TTGGTTAAAAAATGAGCTGATTTAACAAAAATTTAACGCGAATTTTAACAAAATATTAACGCTTAC  
AATTTAG

## References

1. Akematsu, T.; Fukuda, Y.; Garg, J.; Fillingham, J. S.; Pearlman, R. E.; Loidl, J. Post-meiotic DNA double-strand breaks occur in *Tetrahymena*, and require Topoisomerase II and Spo11. *eLife* **2017**, *6*, e26176, doi:10.7554/eLife.26176.
