# Supplementary material for: Resistance to 6-Methylpurine is Conferred by Defective Adenine Phosphoribosyltransferase in Tetrahymena
Source: MDPI journal article supplement (doi:10.3390/genes9040179), 2018-03-23
Supplement: s1 [file s1]

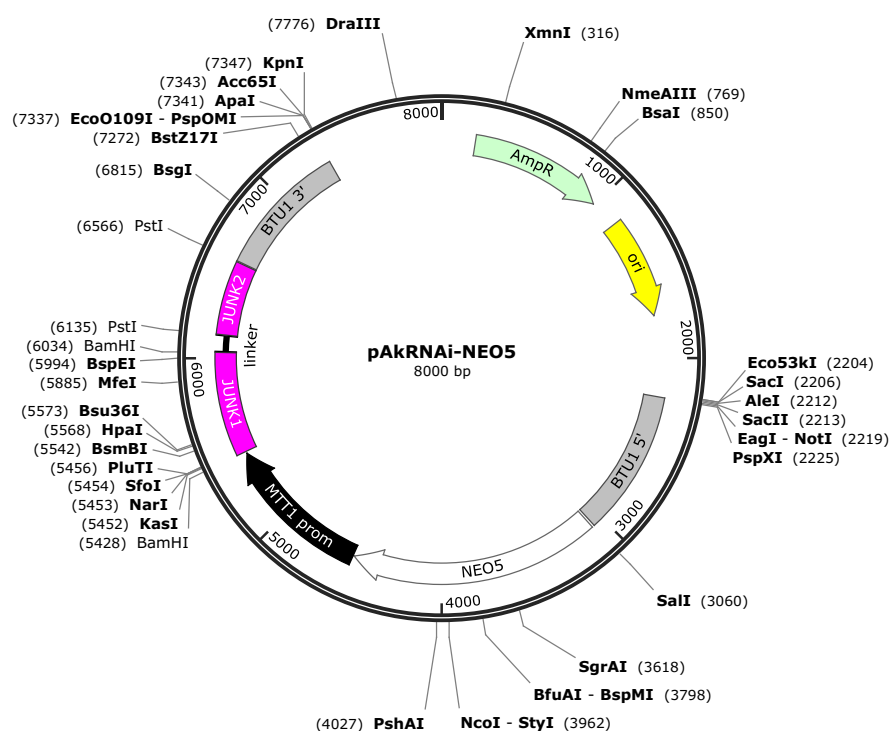

**Figure S4.** Map of the RNAi backbone plasmid pAkRNAi-NEO5, with paromomycin resistance cassette (*NEO5*), *MTT1* promoter, junk DNA sequences separated by a linker sequence, and 5' and 3' UTRs of *BTU1*. Target sequences to create the hairpin construct were cloned into BamHI–BamHI sites and PstI–PstI sites. The entire sequence of the plasmid is depicted at the bottom of the figure.

5' and 3' UTRs of *BTU1*

NEO5 cassette

MTT1 promoter

Junk sequences

Linker

GTGGCACTTTTCGGGGAAATGTGCGCGGAACCCCTATTTGTTTATTTTCTAAATACATTCAAATA  
TGTATCCGCTCATGAGACAATAACCCTGATAAATGCTTCAATAATATTGAAAAAGGAAGAGTATGA  
GTATTCAACATTTCCGTGTCGCCCTTATTCCCTTTTTTGCGGCATTTTGCCTTCCTGTTTTTGCTC  
ACCCAGAAACGCTGGTGAAAGTAAAAGATGCTGAAGATCAGTTGGGTGCACGAGTGGGTTACATCG  
AACTGGATCTCAACAGCGGTAAGATCCTTGAGAGTTTTCGCCCCGAAGAACGTTTTCCAATGATGA  
GCACTTTTAAAGTTCTGCTATGTGGCGCGGTATTATCCCGTATTGACGCCGGGCAAGAGCAACTCG  
GTCGCCGCATACACTATTCTCAGAATGACTTGGTTGAGTACTCACCAGTCACAGAAAAGCATCTTA  
CGGATGGCATGACAGTAAGAGAATTATGCAGTGCTGCCATAACCATGAGTGATAACACTGCGGCCA  
ACTTACTTCTGACAACGATCGGAGGACCGAAGGAGCTAACCGCTTTTTTGCACAACATGGGGGATC

ATGTAAC TCGCCTTGATCGTTGGGAACCGGAGCTGAATGAAGCCATACCAAACGACGAGCGTGACA  
CCACGATGCCTGTAGCAATGGCAACAACGTTGCGCAAAC TATTA ACTGGCGAACTACTTACTCTAG  
CTTCCCGGCAACAATTAATAGACTGGATGGAGGCGGATAAAGTTGCAGGACCACTTCTGCGCTCGG  
CCCTTCCGGCTGGCTGGTTTATTGCTGATAAATCTGGAGCCGGTGAGCGTGGGTCTCGCGGTATCA  
TTGCAGCACTGGGGCCAGATGGTAAGCCCTCCCGTATCGTAGTTATCTACACGACGGGGAGTCAGG  
CAACTATGGATGAACGAAATAGACAGATCGCTGAGATAGGTGCCTCACTGATTAAGCATTGGTAAC  
TGTCAGACCAAGTTTACTCATATATACTTTAGATTGATTTAAAACTTCATTTTTAATTTAAAAGGA  
TCTAGGTGAAGATCCTTTTTGATAATCTCATGACCAAAATCCCTTAACGTGAGTTTTCGTTCCACT  
GAGCGTCAGACCCCGTAGAAAAGATCAAAGGATCTTCTTGAGATCCTTTTTTTCTGCGCGTAATCT  
GCTGCTTGCAAACAAAAAAACCACCGCTACCAGCGGTGGTTTGTGTTGCCGGATCAAGAGCTACCAA  
CTCTTTTTCCGAAGGTAAC TGGCTTCAGCAGAGCGCAGATACCAAATACTGTCCTTCTAGTGTAGC  
CGTAGTTAGGCCACCACTTCAAGAACTCTGTAGCACCGCCTACATACCTCGCTCTGCTAATCCTGT  
TACCAGTGGCTGCTGCCAGTGGCGATAAGTCGTGTCTTACCGGGTTGGACTCAAGACGATAGTTAC  
CGGATAAGGCGCAGCGGTCGGGCTGAACGGGGGGTTTCGTGCACACAGCCCAGCTTGGAGCGAACGA  
CCTACACCGAACTGAGATACCTACAGCGTGAGCTATGAGAAAGCGCCACGCTTCCCGAAGGGAGAA  
AGGCGGACAGGTATCCGGTAAGCGGCAGGGTCGGAACAGGAGAGCGCACGAGGGAGCTTCCAGGGG  
GAAACGCCTGGTATCTTTATAGTCCTGTCGGGTTTCGCCACCTCTGACTTGAGCGTCGATTTTTGT  
GATGCTCGTCAGGGGGGCGGAGCCTATGAAAAACGCCAGCAACGCGGCCTTTTTACGGTTCCTGG  
CCTTTTGCTGGCCTTTTGCTCACATGTTCTTTCTGCGTTATCCCCTGATTCTGTGGATAACCGTA  
TTACCGCCTTTGAGTGAGCTGATACCGCTCGCCGCAGCCGAACGACCGAGCGCAGCGAGTCAGTGA  
GCGAGGAAGCGGAAGAGCGCCCAATACGCAAACCGCCTCTCCCCGCGCGTTGGCCGATTCATTAAT  
GCAGCTGGCACGACAGGTTTCCCGACTGGAAAGCGGGCAGTGAGCGCAACGCAATTAATGTGAGTT  
AGCTCACTCATTAGGCACCCCAGGCTTTACACTTTATGCTTCCGGCTCGTATGTTGTGTGGAATTG  
TGAGCGGATAACAATTTACACAGGAAACAGCTATGACCATGATTACGCCAAGCGCGCAATTAACC  
CTCACTAAAGGGAACAAAAGCTGGAGCTCCACCGCGGTGGCGGCCGCTCGAGTCTAGAGTTGTTTG  
GATAATTAGATCTCTCTCTTTCTATCGTATTTTGCAATAATAGGTATTA ACTTTTTATACTGATTGT  
TAGTAGATGCCTTCAAATTTTCTTTTTATTTAAATTCATATGCTATATCTTTTAAAACTCCACA  
TTTTATTGTTGCTAACTGTGCTATTGATCTTTAAGTCAATAGCTGCTCATTTTGTTGAACTCCACA  
GAGACACTAAATTTGTTTATTTTGATGGATGCTTTATAATTAAAGTTACGTAATCTGCTTGACATT  
TAGCCAACTATATAAAAAAGATCAAATGTAGCTTAAATCTCAAAAAATCATCATAATTTACTATC  
AAATTATTAAGAAATTCATATAATCACCCTTTATTGACTTTTATTCATCTTATAGAGTGATAGTA  
GAGTTGAGCCAAATTGATACTTGTTTACGTTGTATTATTTTGAAATTTTAAAAAAATGAAAATGAG  
AGAAAAATTTATTTAAATTTGAGCTTAGAATCTTTAAGGAAGATCAAAAATGGGCTAACTAAATGT  
TAGAGTACGAAGACTGTTCTTGAAATAAAGTGTATCCTTTACGAATCAAGTTGCTACTTTAATGA  
ATAATAGAATTTGAGGTAGAGCTAAAATGAGAGATATAGTAATGCTATTGGATTATATTTGGTTTG  
TATGATGGTTTTTCTTTGGTAAATGAATGATATAAATGAAGAGTGGCAATAAAATTAATTGAAATT

GAATGAAAAAATGAATAGAAATTAAAGAAGAGTATAATTTTATTTTGAATTTTATTTAAATTTTA  
ATGCGTGTATTTATTTGGGTGATGTCGACTTGATATCTTCAAAGTATGGATTAATTATTTCAAATT  
ATTAGAAGGTAATTAATCTGCATAAATTCAAAACATAAAAAATAAACATTAAATTAATTC AAC  
TTATTGAAGCATCAAAATCTGAATCTCTAGAAAGACTGATTCTGATTGGATAATTTTTCGGCGCTA  
AGGATTTTGGATTAAAGAAAATTAGATTTAATTATTAATCATGATTTGAATAGGATAGCAAGAATA  
TTTGTTTGGTTTAAAAGGGAAAGCGGGTAATTATCAAAAATTTATAAATAATTTTAAAACAATAAA  
TAGAAAAACAAATAAGATTATAAAAACTTACAAAAATGATTGAACAAGATGGTTTACACGCTGGTT  
CTCCCGCCGCTTGGGTGCGAAAGACTTTTTCGGTTATGACTGGGCTCAACAAACCATCGGTTGCTCTG  
ATGCCGCCGTCTTCCGTCTTTCTGCTCAAGGTCGTCTGTCTTTTCGTCAAGACCGACCTTTCTG  
GTGCCCTTAATGAACTTCAAGATGAAGCTGCCCGTCTTTCTTGGCTTGCCACCACCGGTGTTCTT  
GCGCTGCTGTCCTTGACGTTGTCACTGAAGCCGGTAGAGACTGGCTTCTTTTAGGTGAAGTCCCCG  
GTCGAGATCTTCTTTCTTCTCACCTTGCTCCTGCCGAAAAAGTTTCTATCATGGCTGATGCTATGC  
GTCGTCTTCATACCCTTGATCCCGCTACCTGCCCTTTGACCACCAAGCCAAACATCGTATCGAAC  
GTGCTCGTACTCGTATGGAAGCCGGTCTTGTCGATCAAGATGATCTTGACGAAGAACATCAAGGTC  
TTGCCCCTGCCGAACTTTTCGCCAGACTTAAGGCCCGTATGCCCGACGGTGAAGATCTTGTCGTCA  
CCCATGGTGATGCCTGCTTACCCAATATCATGGTTGAAAATGGTCGTTTTTCTGGTTTCATCGACT  
GTGGTCGTCTTGGTGTCGCCGACCGTTATCAAGATATTGCCTTAGCTACCCGTGATATCGCTGAAG  
AACTTGGTGGTGAATGGGCTGACCGTTTCCTTGTCCTTTACGGTATCGCCGCTCCCGATTCTCAAC  
GTATCGCCTTCTATCGTCTTCTTGACGAATTCTTCTGAGATCCTTAAATTAAAAATTCAATATATA  
TTTACAACTTTTCATATAAAATAAATATATTATATAAAATTAATTTT TAGTGTATTATATTAACAT  
TAAAGCACCAAAAAACGTGTTAATACTACTATAAAATATAATTTATTCCAAATTGACTAAAAT  
CATTATTTTACAACTCATTGTATATATATTTTATGTCAATTATTTTTTTTAACTTTCTAAAAAAA  
AAAATTCCTCTTCACATACATGTTAGCTCTTAAAAATTTGTCTGCAAATCCAATAATAATATTTTT  
TTTTGCCATTAAATTTTCAAATTTTACTGGAAAAATGCAGCCCGGGGGATCAGACAATTTATTTT  
TAAAAAATATTTAAAAATAAAAAATAAAGGGTTTTGAATAACTCCTTTAATTTAAATACACATT  
TTTAAATTTTTTTTAGCTCTTTAAATATTCATAAAAAATAAAAAATAACTAACTAAAAATAAATAA  
AAGATAATAATGATTAAAGGTATAATACTGAATAAGAAAAACATAATAGAGTACTTATTTTTTTAT  
ATCACTATTTTTTAATATCTTGAAAGCAAACTTTTTTATATATCTTAAATATATTGTATCGTTTA  
TTCAATTATTTTCTTTAAATTTCAAATATATTGATAAAAAAGATGACATGTTTTTTAAAGAAAACA  
TGAAATATAAAATAGATAAATATCAATTATTTTATTTATTAAATATATAAGCTGCTCAAAACATAG  
CTCATTCATCAATTATAATATGTGAATCATTAATTTTCAAATATTACTCATTATTTAGGCTATCA  
TTTATTTTTTATTTTCAATTATCCGTTTCTATTATATTTTAATATTAAGTTGTGATTCTTGAATTT  
TGTGTCATGAATTATTTGTAAATCTTTTTATTTCTGATAAAAAATATAAATTGATTGACTCATGAT  
TTAAATCATGAGTCAACCTAACTAATTTTCAAATTTCTTCTATTCTAAAATATAGATGTGATTCTT  
GAATCTCTCTTGAATATAAAGTAATTTTTTATATTTCTGATATAATTCTTAGCTACGTGATTCACG  
ATTTATGCAATGATCCATATAAAATAATGTAAATAGTGTATATATATATATTCGTCTTTTTTTATTC

TTTATATAATTTAAAAAATTAAAAAATTTAATAAAGCTCTAATAAAATAAATAATAATACTAAA  
CTTAAACATCCCGGGGGATCCAAATTGTTCTACAAACCGGGCGCCTGCTCTCTCGCTTCCCATATC  
ACCCTGCGTGAGAGCGGAAAGGATTTTACGCTCGTCAGTGTGGATTTAATGAAAAACGTCTCGAA  
AACGGTGACGATTACTTTGCCGTTAACCTAAGGGACAGGTGCCTGCATTGCTGCTGGACGATGGT  
ACTTTGCTGACGGAAGGCGTAGCAATTATGCAGTATCTTGCCGACAGCGTCCCCGACCGCCAGTTG  
CTGGCACCGGTAAACAGTATTTCCCGCTATAAAACCATCGAATGGCTGAATTACATCGCCACCGAG  
CTGCATAAAGGCTTCACACCTCTGTTTTCGCCCTGATACACCGGAAGAGTACAAACCAACAGTTCGC  
GCGCAGCTGGAGAAGAACTGCAATATGTGAACGATGCTCTGAAGGATGAGCACTGGATCTGCGGG  
CAACGATTTACAATTGCTGATGCCTATCTGTTTACGGTTCTGCGCTGGGCATACGCGGTGAAACTG  
AATCTGGAAGGGTTAGAGTACATTGCGGCATTTATGCAACATATGGCTGAACGTCCGGAAGTACAA  
GACGCGCTGTCAGCGGAAGGCTTAAAGGGATCCGTAAGTAACGGATATGCAAAAGtaaacaaattt  
taggctttttataaaaaataggaagcaggccggcggtAGATAAAAGAAGAATTCAAAGGCTGCAGct  
cgtcagggggggcgggagcctatggaaaaacgccagcaacgcggcctttttacgggttcctggcctttt  
gctggccttttgctcacatgttctttcctgcgttatcccctgattctgtggataaccgtattaccg  
cctttgagtgagctgataccgctcgcgcagccgaacgaccgagcgcagcgagtcagtgagcgagg  
aagcgggaagagcgcccaatacgcaaaccgcctctccccgcgcgttgggccgattcattaatgcagct  
ggcacgacaggtttcccgactggaaagcgggcagtgagcgcgaacgcaattaatgtgagttagctca  
ctcattagggaccccaggcctttacactttatgcttccggctcgtatgttggtggaattgtgagcg  
gataacaatttcacacaggaaacagctCTGCAGGCGAACTGAATCGGTCAGCTAAACCAACCAATC  
AACATAATAAECTTTATTATTTTTACTTAAGCATCTTACTGTTGTTGTAATAGTAGAGAAAGAAAT  
ACCCAATTAECTTCATTCACATAACATTAATATCTATAAACATCTTTTTTCTCACATATATACAAC  
TCTCTAAATCAACAAATAAECTTTTTAAAAATAATGGATATATATTAACAAAAATAATATATCTCTTT  
TTACAAAATAGTTCTTATATAAAATACGTATTCTGCACTCACCCGCATTTTTTCAACAACAAAAACATA  
CCAAAAAATTCTTACTTCTACATGTTTCCTTTCTTATTATTACAAAATTATTTTATAAATAGCAT  
ACAAAAATAAATACAATAAAAAAATAAACAAAATCCTTTTTTATTTTGAATTATTTAAAACAAATA  
TTTTCAATCAATCAGTCAGTCAGCATAATATTAAAGCAACAAAACAAACCCAAGTTGTTTTTATAG  
TTTTTTAATTGCTTTTCAGTACTATAAATAAATTTGTTATTACTTCAAGATTGATAAACTTCTTTT  
TTAAATTAAATATCTATGAATGAATAAATAAGTTGATATCTCTTTTTTAACCTGTTTTCTCTCTTT  
TACTTACTTGCCAATTTTTTTTTTTAAATTAAAGAAATATCTTTTTATTTTTCAAAAACAAAATTTA  
TTTTCCCTTGATACAAAACCCCTTTATTTAAATAAAATCTTTATGCCCATCAATAGCCACATCT  
TCTCGAGGGGGGGCCCGGTACCCAATTCGCCCTATAGTGAGTCGTATTACGCGCGCTCACTGGCCG  
TCGTTTTACAACGTCGTGACTGGGAAAACCCTGGCGTTACCCAACCTAATCGCCTTGCAGCACATC  
CCCCTTTCGCCAGCTGGCGTAATAGCGAAGAGGCCCGCACCGATCGCCCTTCCCAACAGTTGCGCA  
GCCTGAATGGCGAATGGGACGCGCCCTGTAGCGGCGCATTAAGCGCGGCGGGTGTGGTGGTTACGC  
GCAGCGTGACCGCTACACTTGCCAGCGCCCTAGCGCCCGCTCCTTTTCGCTTTCTTCCCTTCCTTTC  
TCGCCACGTTTCGCCGGCTTTCCCCGTCAAGCTCTAAATCGGGGGCTCCCTTTAGGGTTCCGATTTA

GTGCTTTACGGCACCTCGACCCCAAAAACTTGATTAGGGTGATGGTTCACGTAGTGGGCCATCGC  
CCTGATAGACGGTTTTTCGCCCTTTGACGTTGGAGTCCACGTTCTTTAATAGTGGACTCTTGTTCC  
AAACTGGAACAACACTCAACCCTATCTCGGTCTATTCTTTTGATTTATAAGGGATTTTGCCGATTT  
CGGCCTATTGGTTAAAAAATGAGCTGATTTAACAAAAATTTAACGCGAATTTTAACAAAATATTAA  
CGCTTACAATTTAG
