# Supplementary material for: Resistance to 6-Methylpurine is Conferred by Defective Adenine Phosphoribosyltransferase in Tetrahymena
Source: MDPI journal article supplement (doi:10.3390/genes9040179), 2018-03-23
Supplement: s1 [file s1]

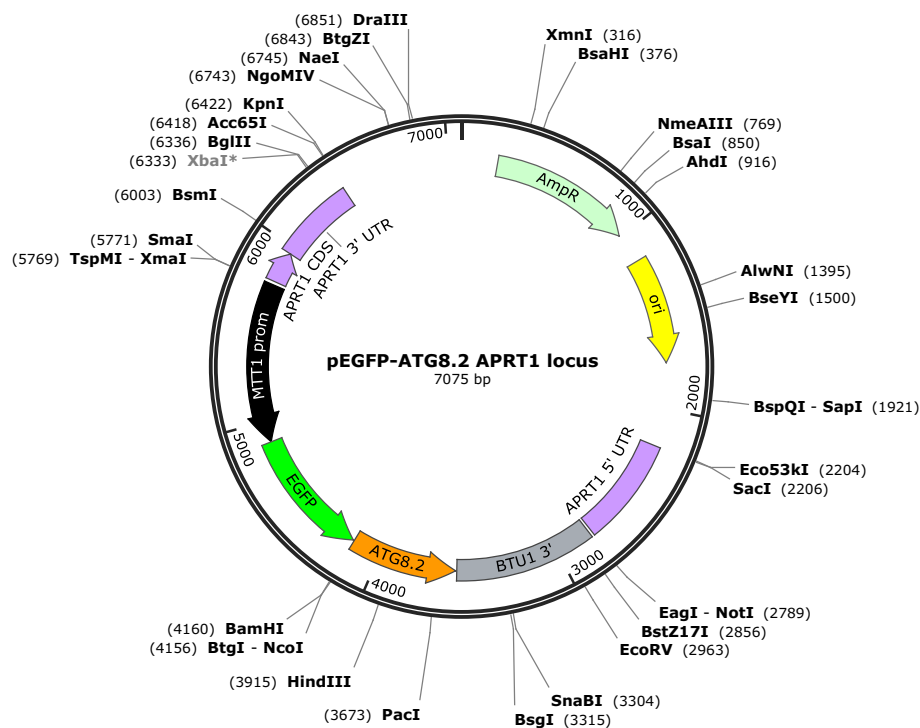

**Figure S7.** Map of trial plasmid pEGFP-ATG8.2 APRT1 locus. *NEO5* cassette of pΔAPRT1-NEO5 (Figure S2) was replaced by an EGFP-tagged ATG8.2–expressing cassette.

acgt: 5' and 3' UTRs of APRT1

ACGT: APRT1 CDS

3' UTR of BTU1

ATG8.2 CDS

EGFP

MTT1 promoter

GTGGCACTTTTCGGGGAAATGTGCGCGGAACCCCTATTTGTTTATTTTTCTAAATACATTCAAATA  
TGTATCCGCTCATGAGACAATAACCCCTGATAAATGCTTCAATAATATTGAAAAAGGAAGAGTATGA  
GTATTCAACATTTCCGTGTCGCCCTTATTCCTTTTTTGCGGCATTTTGCCTTCCTGTTTTTGCTC  
ACCCAGAAACGCTGGTGAAAGTAAAAGATGCTGAAGATCAGTTGGGTGCACGAGTGGGTACATCG  
AACTGGATCTCAACAGCGGTAAGATCCTTGAGAGTTTTCGCCCCGAAGAACGTTTTCCAATGATGA  
GCACTTTTAAAGTTCTGCTATGTGGCGCGGTATTATCCCGTATTGACGCCGGGCAAGAGCAACTCG  
GTCGCCGCATACACTATTCTCAGAATGACTTGGTTGAGTACTCACCAGTCACAGAAAAGCATCTTA  
CGGATGGCATGACAGTAAGAGAATTATGCAGTGCTGCCATAACCATGAGTGATAACACTGCGGCCA  
ACTTACTTCTGACAACGATCGGAGGACCGAAGGAGCTAACCGCTTTTTTGCACAACATGGGGGATC  
ATGTAACCTCGCCTTGATCGTTGGGAACCGGAGCTGAATGAAGCCATACCAAACGACGAGCGTGACA  
CCACGATGCCTGTAGCAATGGCAACAACGTTGCGCAAACCTATTAACCTGGCGAACTACTTACTCTAG

CTTCCCGGCAACAATTAATAGACTGGATGGAGGCGGATAAAGTTGCAGGACCACTTCTGCGCTCGG  
CCCTTCCGGCTGGCTGGTTTATTGCTGATAAATCTGGAGCCGGTGAGCGTGGGTCTCGCGGTATCA  
TTGCAGCACTGGGGCCAGATGGTAAGCCCTCCCGTATCGTAGTTATCTACACGACGGGGAGTCAGG  
CAACTATGGATGAACGAAATAGACAGATCGCTGAGATAGGTGCCTCACTGATTAAGCATTGGTAAC  
TGTCAGACCAAGTTTACTCATATATACTTTAGATTGATTTAAACTTCATTTTTAATTTAAAAGGA  
TCTAGGTGAAGATCCTTTTTTGATAATCTCATGACCAAATCCCTTAACGTGAGTTTTCGTTTCCACT  
GAGCGTCAGACCCCGTAGAAAAGATCAAAGGATCTTCTTGAGATCCTTTTTTTCTGCGCGTAATCT  
GCTGCTTGCAAACAAAAAACCACCGCTACCAGCGGTGGTTTGTGTTGCCGGATCAAGAGCTACCAA  
CTCTTTTTTCCGAAGGTAAGTGGCTTCAGCAGAGCGCAGATACCAAATACTGTCCTTCTAGTGTAGC  
CGTAGTTAGGCCACCACTTCAAGAACTCTGTAGCACCGCCTACATACCTCGCTCTGCTAATCCTGT  
TACCAGTGGCTGCTGCCAGTGGCGATAAGTCGTGTCTTACCGGGTTGGACTCAAGACGATAGTTAC  
CGGATAAGGCGCAGCGGTGCGGCTGAACGGGGGGTTCTGTGCACACAGCCCAGCTTGAGCGAACGA  
CCTACACCGAACTGAGATACCTACAGCGTGAGCTATGAGAAAGCGCCACGCTTCCCGAAGGGAGAA  
AGGCGGACAGGTATCCGGTAAGCGGCAGGGTCGGAACAGGAGAGCGCACGAGGGAGCTTCCAGGGG  
GAAACGCCTGGTATCTTTATAGTCCTGTCGGGTTTCGCCACCTCTGACTTGAGCGTCGATTTTTGT  
GATGCTCGTCAGGGGGGCGGAGCCTATGGAAAAACGCCAGCAACGCGGCCTTTTTACGGTTCCTGG  
CCTTTTGCTGGCCTTTTGCTCACATGTTCTTTTCTGCGTTATCCCCTGATTCTGTGGATAACCGTA  
TTACCGCCTTTGAGTGAGCTGATACCGCTCGCCGACGCCGAACGACCGAGCGCAGCGAGTCAGTGA  
GCGAGGAAGCGGAAGAGCGCCCAATACGCAAACCGCCTCTCCCCGCGCGTTGGCCGATTCAATTAAT  
GCAGCTGGCACGACAGGTTTCCCGACTGGAAAGCGGGCAGTGAGCGCAACGCAATTAATGTGAGTT  
AGCTCACTCATTAGGCACCCCAGGCTTTACACTTTATGCTTCCGGCTCGTATGTTGTGTGGAATTG  
TGAGCGGATAACAATTTACACAGGAAACAGCTATGACCATGATTACGCCAAGCGCGCAATTAACC  
CTCACTAAAGGGAACAAAAGCTGGAGCTCgagctgaatgaatgaatgaatgaatgtatztatgaat  
gaattaatgcaataaataataaaataatactttttataatatttagttaaattatatgtctact  
atatataaatatttctttaactccatcttaaagacaccaaataccttagctatttattaggtttt  
ataacaaaaatcatttgatttttagttaagcaacaagtaagcaatggttttaatacaataaat  
aattttatttatcttaaaatcaaattttattgaagattttttattcaaataaattttctttattat  
tcgttttgagtattttatcatcctcgcttactgattttgttcaaaatatccttttattgatattaa  
ttgcttaaattaattagagttaagctcaatattttgagtgaatttgaaaaattctgaaattattt  
tcatttggaatttgcttttcaagatatctattttgtaataaaaaataaaaaatattaagacaattaa  
ttagaaaaatagataaatatcactctattttcaggatttgctttactttctttttgattgatttgt  
ggggtaataaaaattGGCGGCCGCGTCGAGAAGATGTGGCTATTGATGGGCATAAAGATTTTATTTA  
AATAAAGGGGTTTTTGTATACAAGGGAAAATAAATTTTGTGTTTTGAAAAATAAAAAGATATTTCTT  
TAATTTAAAAAAAATTGGCAAGTAAGTAAAAGAGAGGAAAACAAGTTAAAAAGAGATATCAACT  
TATTTATTCATTCATAGATATTTAATTTAAAAAAGAAGTTTATCAATCTTGAAGTAATAACAAATT  
TATTTATAGTACTGAAAAGCAATTAAAAAACTATAAAAACAACTTGGGTTTGTGTTTGTGCTTTAA  
TATTATGCTGACTGACTGATTGATTGAAAATATTTGTTTTAAATAATTCAAAATAAAAAAGGATTT  
TGTTTTATTTTTTTATTGTATTTATTTTTGTATGCTATTTATAAAATAATTTTGTAAATAATAAGAAA  
GGAAACATGTAGAAGTAAGAATTTTTTTTGGTATGTTTTTGTGTGAAAAATGCGGGTGAGTGCAGA  
ATACGTATTTATATAAGAACTATTTTGTA AAAAGAGATATATTATTTGTTAATATATATCCATTA  
TTTTTAAAAAGTTATTTGTGATTAGAGAGTTGTATATATGTGAGAAAAAAGATGTTTATAGATA  
TTAATGTTATGTGAATGAAGTTAATTGGGTATTTCTTTCTCTACTATTACAACAACAGTAAGATGC  
TTAAGTAAAAATAATAAAGTTTATTATGTTGATTGGTTGGTTTAGCTGACCGATTCAAGTTCGCTCA  
ACTAGTAATTGATCCAAATACTTCTTGATCAGAGTATGTGATATATAAGAAACCATCATCCTTATC

CTTTGATTCTTGGTAAATTTTCGCTCATTGTTCTATCTATTAATTAATTATAAGATTAAAATTAATG  
AAAATTAATTCAAAGTTTTGATTGCTTAATTTTAGAATTCATTTTATTTAGATAGATTGTTTTTGA  
ATGAATTTCTACATTCAACTTAAATAATTGATTAAAAAGGAAAAATAATTTACTTATTTTCTCA  
ATCTTTTTTATTGCCAACAAAGAAGAACAAAGCATCAGCTTCATTTGTAATATCTAATTTCTTACGA  
ACTGTTTATTGGAATTCGTGAAGCTTAACATCCTTTGATACCAAGAACCTTTTTGTAAATGAAATA  
AATTAATCAAAGTTTTTAAAATCATTATTAATTTGTTTACTTTTGCTTTTCCAATACTCTAACTG  
TTTTTGCTTCTTGTTAATTTCAACAATGACGGGAATCATGTTTGGGTATTTAGATTTCTACTTTT  
CTAATTCTTTCTATCTTTCTGCTAGAGAGAATTTTTCTTGAAGGGTTTATAATTTTGAGCGTCCA  
TGGATCCCTTATATAATTCATCCATACCAAGAGTAATACCAGCAGCAGTAACAAATTCATAAAGAA  
CCATATGATCTCTTTTTTTCATTAGGATCTTTAGATAAAGCTGATTGAGTAGATAAGTAGTGATTAT  
CAGGTAAAAGAACAGGACCATCACCAATAGGAGTATTTTGTGATAATGATCAGCTAATTGAACTG  
AACCATCTTCAATATTATGTCTAATTTTAAAATTAACCTTAATACCATTCTTTTGCTTATCAGCCA  
TAATGTAAACATTATGAGAATTGTAATTATATTCAAGTTTATGACCAAGAATATTACCATCTTCCT  
TGAAATCAATACCTTTAAGTTCAATTCTATTAACATAAGTATCACCTTCAAATTTAACTTCAGCTC  
TAGTTTTATAATTACCATCATCTTTAAAGAAAATAGTTCCTTCTTGAACATAACCTTCAGGCATAG  
CAGACTTAAAGAAATCATGTTGCTTCATGTGATCAGGGTATCTTGAAAAGCATTGAACACCATAAG  
TAAGAGTAGTAACTAAAGTAGGCCAAGGAACAGGTAACCTTACCAGTAGTACAAATAAATTTAAGAG  
TTAACTTACCATAAGTAGCATCACCTTCACCTTCACCTGAAACAGAAAATTTGTGACCATTAACAT  
CACCATCTAATTCAACTAAAATAGGAACAACACCAGTGAAAAGTTCTTCACCCCTTAGAAACCATAT  
GTTTAAAGTTTAGTATTATTATTTTATTATTAGAGCTTTATTAAATTTTTTTTAAATTTTTTTAAATT  
ATATAAAGAATAAAAAAGACGAATATATATATATACACTATTTACATTATTTTATATGGATCATTG  
CATAAATCGTGAATCACGTAGCTAAGAATTATATCAGAAATATAAAAAATTACTTTTATATTCAAGA  
GAGATTCAAGAATCACATCTATATTTTAGAATAGAAGAATTTTGAAAATTAGTTAGGTTGACTCAT  
GATTTAAATCATGAGTCAATCAATTTATATTTTATCAGAAATAAAAAGATTTACAAATAATTCA  
TGACACAAAATTCAAGAATCACAACTTAATATTAATAATAATAGAAACGGATAATTGAAAATAAA  
AAATAAATGATAGCCTAAATAATGAGTAATATTTTGAAAATTAATGATTCACATATTATAATTGAT  
GAATGAGCTATGTTTTGAGCAGCTTATATATTTAATAAATAAAATAAATTGATATTTTATCTATTTTA  
TATTTTCATGTTTTCTTTAAAAACATGTCATCTTTTTTATCAATATATTTGAAATTTAAAGAAAAT  
AATTGAATAAACGATACAATATATTTTAAGATATATAAAAAAGTTTTGCTTTCAAGATATTAAAA  
TAGTGATATAAAAAATAAGTACTCTATTATGTTTTTTCTTATTTCAGTATTATACCTTTAATCATT  
TTATCTTTTTTATTTTATTTTATAGTTAGTTATTTTTTATTTTTTATGAATATTTAAAGAGCTAAAAAA  
ATTTAAAAATGTGTATTTAAATTAAAGGAGTTATTCAAAACCCCTTATTATTTTTTATTTTTTAAATA  
TTTTTTTAGAAATAAATTGTCTGATCCCCGGGGGATCAGCTCGAGGGATCTTAAGGGCGAAGAAAG  
ATTATCTAAATACAAGGTTATTAATCTTCATATTGAATGAataagtgaggtagtgataaaaaataaa  
ataaattgaatgaacaagttagtttgttttgtatgaatgtgttttatatttatggatatagtagg  
aattaaatttttttgatttagtaatttagtatgtacttcttaagtttaataataagatttgc  
tcaatttttgtaaattaagtagttttatgttttttaactacataagtatttatcattgaatgta  
tagttaactaaaattttttatttcaacatttttaagaaagatttttactcttttgttgttat  
atttattgttaaaaaggcttattaaaatagattgaattataaacaacaaagaataattaaacag  
aatgaataaatgatctttctatatataataatatttttaattttcattaaattttataataaaaa  
tttatgatattattaattgactagtttagctggtatcgtatatatatcctgcttttaaggaagt  
gatctattaaatttttaatttaccttagcatgaggttacttaaatatttatttgataggatgtcaa  
ggtcataaataaacgGGTACCCAATTCGCCCTATAGTGAGTCGTATTACGCGCGCTCACTGGCCGT  
CGTTTTACAACGTCGTGACTGGGAAAACCCTGGCGTTACCCAACCTAATCGCCTTGCAGCACATCC

CCCTTTCGCCAGCTGGCGTAATAGCGAAGAGGCCCGCACCGATCGCCCTTCCCAACAGTTGCGCAG  
CCTGAATGGCGAATGGGACGCGCCCTGTAGCGGCGCATTAAGCGCGGCGGGTGTGGTGGTTACGCG  
CAGCGTGACCGCTACACTTGCCAGCGCCCTAGCGCCCGCTCCTTTCGCTTTCCTCCCTTCCTTTCT  
CGCCACGTTGCGCGGCTTTCCTCCGTCAAGCTCTAAATCGGGGGCTCCCTTTAGGGTTCGATTTAG  
TGCTTTACGGCACCTCGACCCCAAAAACTTGATTAGGGTGATGGTTCACGTAGTGGGCCATCGCC  
CTGATAGACGGTTTTTTCGCCCTTTGACGTTGGAGTCCACGTTCTTTAATAGTGGACTCTTGTTCCA  
AACTGGAACAACACTCAACCCTATCTCGGTCTATTCTTTTGATTTATAAGGGATTTTGCCGATTC  
GGCCTATTGGTTAAAAAATGAGCTGATTTAACAAAAATTTAACGCGAATTTTAACAAAATATTAAC  
GCTTACAATTTAG
