# Supplementary material for: Resistance to 6-Methylpurine is Conferred by Defective Adenine Phosphoribosyltransferase in Tetrahymena
Source: MDPI journal article supplement (doi:10.3390/genes9040179), 2018-03-23
Supplement: s1 [file s1]

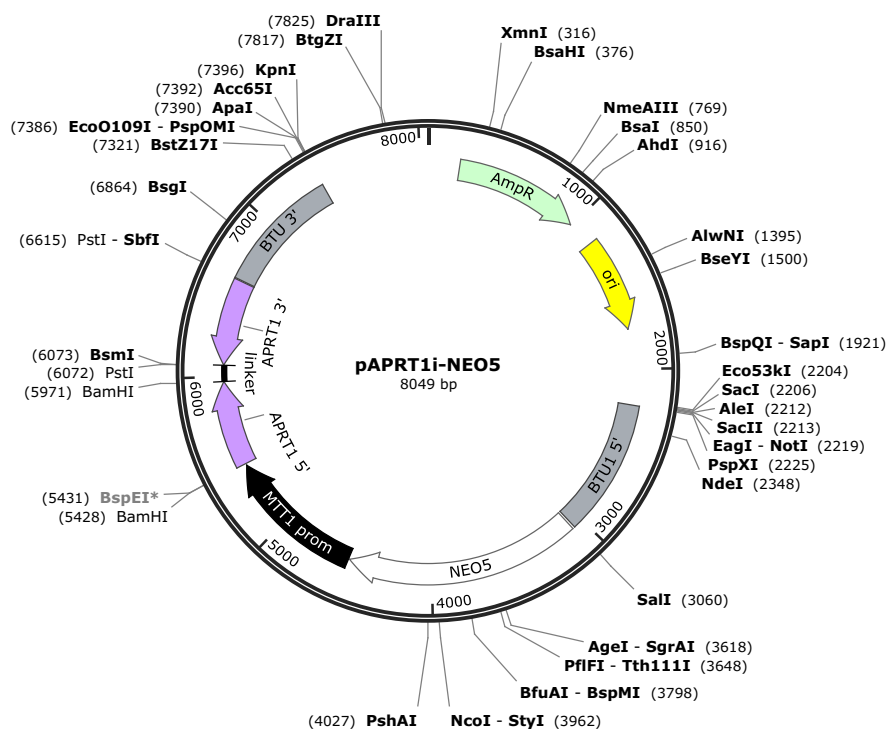

**Figure S5.** Map of the *APRT1* knockdown plasmid pAPRT1i-NEO5, with paromomycin resistance cassette (*NEO5*), cadmium-inducible *MTT1* promoter, hairpin RNAi cassette, and 5' and 3' UTRs of the MAC *BTU1*.

5' and 3' UTRs of BTU1

ACGT: APRT1 CDS

NEO5 cassette

MTT1 promoter

Linker

GTGGCACTTTTCGGGGAAATGTGCGCGGAACCCCTATTTGTTTATTTTTCTAAATACATTCAAATA  
TGTATCCGCTCATGAGACAATAACCCCTGATAAATGCTTCAATAATATTGAAAAAGGAAGAGTATGA  
GTATTC AACATTTCCGTGTCGCCCTTATTCCTTTTTTGCGGCATTTTGCCTTCCTGTTTTTGCTC  
ACCCAGAAACGCTGGTGAAAGTAAAAGATGCTGAAGATCAGTTGGGTGCACGAGTGGGTACATCG  
AACTGGATCTCAACAGCGGTAAGATCCTTGAGAGTTTTCGCCCCGAAGAACGTTTTCCAATGATGA  
GCACTTTTAAAGTTCTGCTATGTGGCGCGGTATTATCCCGTATTGACGCCGGGCAAGAGCAACTCG  
GTCGCCGCATACACTATTCTCAGAATGACTTGGTTGAGTACTCACCAGTCACAGAAAAGCATCTTA  
CGGATGGCATGACAGTAAGAGAATTATGCAGTGCTGCCATAACCATGAGTGATAACACTGCGGCCA  
ACTTACTTCTGACAACGATCGGAGGACCGAAGGAGCTAACCGCTTTTTTGCACAACATGGGGGATC  
ATGTA ACTCGCCTTGATCGTTGGGAACCGGAGCTGAATGAAGCCATACCAAACGACGAGCGTGACA  
CCACGATGCCTGTAGCAATGGCAACAACGTTGCGCAAACCTATTA ACTGGCGAACTACTTACTCTAG

CTTCCCGGCAACAATTAATAGACTGGATGGAGGCGGATAAAGTTGCAGGACCACTTCTGCGCTCGG  
CCCTTCCGGCTGGCTGGTTTATTGCTGATAAATCTGGAGCCGGTGAGCGTGGGTCTCGCGGTATCA  
TTGCAGCACTGGGGCCAGATGGTAAGCCCTCCCGTATCGTAGTTATCTACACGACGGGGAGTCAGG  
CAACTATGGATGAACGAAATAGACAGATCGCTGAGATAGGTGCCTCACTGATTAAGCATTGGTAAC  
TGTCAGACCAAGTTTACTCATATATACTTTAGATTGATTTAAACTTCATTTTTAATTTAAAAGGA  
TCTAGGTGAAGATCCTTTTTTGATAATCTCATGACCAAATCCCTTAACGTGAGTTTTCGTTCCACT  
GAGCGTCAGACCCCGTAGAAAAGATCAAAGGATCTTCTTGAGATCCTTTTTTTCTGCGCGTAATCT  
GCTGCTTGCAAACAAAAAACCACCGCTACCAGCGGTGGTTTGTGTTGCCGGATCAAGAGCTACCAA  
CTCTTTTTTCCGAAGGTAACGGCTTCAGCAGAGCGCAGATACCAAATACTGTCCTTCTAGTGTAGC  
CGTAGTTAGGCCACCACTTCAAGAACTCTGTAGCACCGCCTACATACCTCGCTCTGCTAATCCTGT  
TACCAGTGGCTGCTGCCAGTGGCGATAAGTCGTGTCTTACCGGGTTGGACTCAAGACGATAGTTAC  
CGGATAAGGCGCAGCGGTGCGGCTGAACGGGGGGTTCTGTGCACACAGCCCAGCTTGAGCGAACGA  
CCTACACCGAACTGAGATACCTACAGCGTGAGCTATGAGAAAGCGCCACGCTTCCCGAAGGGAGAA  
AGGCGGACAGGTATCCGGTAAGCGGCAGGGTCGGAACAGGAGAGCGCACGAGGGAGCTTCCAGGGG  
GAAACGCCTGGTATCTTTATAGTCCTGTCGGGTTTCGCCACCTCTGACTTGAGCGTCGATTTTTGT  
GATGCTCGTCAGGGGGGCGGAGCCTATGGAAAAACGCCAGCAACGCGGCCTTTTTACGGTTCCTGG  
CCTTTTGCTGGCCTTTTGCTCACATGTTCTTTTCTGCGTTATCCCCTGATTCTGTGGATAACCGTA  
TTACCGCCTTTGAGTGAGCTGATACCGCTCGCCGCAGCCGAACGACCGAGCGCAGCGAGTCAGTGA  
GCGAGGAAGCGGAAGAGCGCCCAATACGCAAACCGCCTCTCCCCGCGCGTTGGCCGATTCAATTAAT  
GCAGCTGGCACGACAGGTTTCCCGACTGGAAAGCGGGCAGTGAGCGCAACGCAATTAATGTGAGTT  
AGCTCACTCATTAGGCACCCCAGGCTTTACACTTTATGCTTCCGGCTCGTATGTTGTGTGGAATTG  
TGAGCGGATAACAATTTACACAGGAAACAGCTATGACCATGATTACGCCAAGCGCGCAATTAACC  
CTCACTAAAGGGAACAAAAGCTGGAGCTCCACCGCGGTGGCGGCCGCTCGAGTCTAGAGTTGTTTG  
GATAATTAGATCTCTCTCTTTCTATCGTATTTTGCAATAATAGGTATTAACTTTTATACTGATTGT  
TAGTAGATGCCTTCAAATTTTCTTTTTATTTAAATTCATATGCTATATCTTTTAAACACTCCACA  
TTTTATTGTTGCTAACTGTGCTATTGATCTTTAAGTCAATAGCTGCTCATTTTGTTGAACTCCACA  
GAGACACTAAATTTGTTTATTTTGATGGATGCTTTATAATTAAAGTTACGTAATCTGCTTGACATT  
TAGCCAATAATATAAAAAAGATCAAAATGTAGCTTAAATCTCAAAAAATCATCATAATTTACTATC  
AAATTATTAAGAAATTCATATAATCACCACCTTTATTGACTTTTATTCATCTTATAGAGTGATAGTA  
GAGTTGAGCCAAATTGATACTTGTTTACGTTGTATTATTTTGAAATTTTAAAAAATGAAATGAG  
AGAAAAATTTATTTAAATTTGAGCTTAGAATCTTTAAGGAAGATCAAAAATGGGCTAACTAAATGT  
TAGAGTACGAAGACTGTTCTTGAAATAAAGTGTGCATCCTTTACGAATCAAGTTGCTACTTTAATGA  
ATAATAGAATTTGAGGTAGAGCTAAAATGAGAGATATAGTAATGCTATTGGATTATATTTGGTTTG  
TATGATGGTTTTTTCTTTGGTAAATGAATGATATAAATGAAGAGTGGCAATAAAATTAATTGAAATT  
GAATGAAAAAATGAATAGAAATTAAGAAGAGTATAATTTTTATTTTTGAATTTTATTTAAATTTTA  
ATGCGTGTATTTATTTGGGTGATGTCGACTTGATATCTTCAAAGTATGGATTAATTTTCAAATT  
ATTAGAAGGTAATTAATCTGCATAAATTCAAACCTATAAAAAATAAACATTAATTAATTCAACC  
TTATTGAAGCATCAAAATCTGAATCTCTAGAAAGACTGATTCTGATTGGATAATTTTTCGGCGCTA  
AGGATTTTGGATTAAAGAAAATTAGATTTAATTATTAATCATGATTTGAATAGGATAGCAAGAATA  
TTTGTTTGGTTTAAAGGGAAAGCGGGTAATTATCAAAAATTTATAAATAATTTTAAACAATAAA  
TAGAAAAACAAATAAGATTATAAAAACTTACAAAATGATTGAACAAGATGGTTTACACGCTGGTT  
CTCCCGCCGCTTGGGTGCAAAGACTTTTCGGTTATGACTGGGCTCAACAAACCATCGGTTGCTCTG  
ATGCCGCCGTCTTCCGTCTTTCTGCTCAAGGTCGTCTGTTCTTTTCGTCAAGACCGACCTTTCTG  
GTGCCCTTAATGAACTTCAAGATGAAGCTGCCCGTCTTTCTTGGCTTGCCACCACCGGTGTTCTT

GCGCTGCTGTCCTTGACGTTGTCACTGAAGCCGGTAGAGACTGGCTTCTTTTAGGTGAAGTCCCCG  
GTCGAGATCTTCTTTCTTCTCACCTTGCTCCTGCCGAAAAAGTTTCTATCATGGCTGATGCTATGC  
GTCGTCTTCATACCCTTGATCCCGCTACCTGCCCTTTGACCACCAAGCCAAACATCGTATCGAAC  
GTGCTCGTACTCGTATGGAAGCCGGTCTTGTGATCAAGATGATCTTGACGAAGAACATCAAGGTC  
TTGCCCCTGCCGAACCTTTTCGCCAGACTTAAGGCCCGTATGCCCGACGGTGAAGATCTTGTGCTCA  
CCCATGGTGATGCCTGCTTACCCAATATCATGGTTGAAAATGGTCGTTTTTCTGGTTTCATCGACT  
GTGGTCGTCTTGGTGTGCGCGACCGTTATCAAGATATTGCCTTAGCTACCCGTGATATCGCTGAAG  
AACTTGGTGGTGAATGGGCTGACCGTTTCCTTGTCTTTACGGTATCGCCGCTCCCGATTCTCAAC  
GTATCGCCTTCTATCGTCTTCTTGACGAATTCTTCTGAGATCCTTAAATTAAAAATTCAATATATA  
TTTACAACTTTTCATATAAAATAAATATATTATATAAAATTAATTTTTTAGTGTATTATATTAACAT  
TAAAGCACCAAAAAAACGTGTTAATATACTACTATAAAATATAATTTATTCCAAATTGACTAAAAT  
CATTATTTTACAACTCATTGTATATATATTTTATGTCAATTATTTTTTTTTTAACCTTCTAAAAAA  
AAAATTCCTCTTCACATACATGTTAGCTCTTAAAAATTTGTCTGCAAATCCAATAATAATATTTTT  
TTTTGCCATTAAATTTTCAAATTTTACTGGAAAAATGCAGCCCGGGGGGATCAGACAATTTATTTTC  
TAAAAAATATTTTAAAAATAAAAAATAATAAGGGTTTTGAATAACTCCTTTAATTTAAATACACATT  
TTTAAATTTTTTTTTAGCTCTTTAAATATTCATAAAAAATAAAAAATACTAACTAAAAATAAATAA  
AAGATAATAATGATTAAAGGTATAATACTGAATAAGAAAAACATAATAGAGTACTTATTTTTTTAT  
ATCACTATTTTAAATATCTTGAAAGCAAACTTTTTTATATATCTTAAATATATTGTATCGTTTA  
TTCAATTATTTTCTTTAAATTTCAAATATATTGATAAAAAAGATGACATGTTTTTTAAAGAAAACA  
TGAAATATAAAATAGATAAATATCAATTATTTTATTTATTAAATATATAAGCTGCTCAAAACATAG  
CTCATTCATCAATTATAATATGTGAATCATTAATTTTCAAATATTACTCATTTATTAGGCTATCA  
TTTATTTTTTTATTTTCAATTATCCGTTTCTATTATATTTTAAATATTAAGTTGTGATTCTTGAATTT  
TGTGTCATGAATTATTTGTAAATCTTTTTATTTCTGATAAAAAATATAAATTGATTGACTCATGAT  
TTAAATCATGAGTCAACCTAACTAATTTTCAAATTTCTTCTATTCTAAAATATAGATGTGATTCTT  
GAATCTCTCTTGAATATAAAGTAATTTTTTATATTTCTGATATAATTCTTAGCTACGTGATTCACG  
ATTTATGCAATGATCCATATAAAATAATGTAAATAGTGTATATATATATATATTCGTCTTTTTTTATTC  
TTTATATAAATTTAAAAAAATTTAAAAAAATTTAATAAAGCTCTAATAAAATAAATAATAATACTAAA  
CTTAAACATCCCAGGGGATCCGGATTACTAAAATTAAGAAATAGGTAAAGTTATTAGCGAAAACCTT  
CAGAAATATTCCCTGATTTCCCTTAACCTGGTATTATCTTTAAAGATATTGCTCCTCTCCTCTCTAA  
TCCTGCCATTTTTTAAGCGTATTACTGATGCTTTTGTAATTGCTTTGAAGGACATTGATTTTGATAA  
AATTGTTATCTTAGAATCTAGAGGTTTTATTTTTTGAACCGCTATTGGTTTACAAATGGGAAAGGG  
ATTAATTTTAATCAGAAAGAAAGGCAAACTACCTGGTAAGGTTGAATAATTCTCATTCGACTTAGA  
ATACGGTAAGGATGTTTTTGAATTCAAAGTGATGCTTTAGCTAAAGGTGAAAAAGTTGTTATTGT  
TGATGATATTCTAGCTACTGGTGGAACCTGCTGATGCAGCTTGCAGATTAGTTGAAAAGGTAGGAGG  
AGTAGTATAAGCTGTTATGTTCCCTTACCAAATTAAGGATCTTAAGGGCGAAGAAAGATTATCTAA  
ATACAAGGTTATTAATCTTCATATTGAATGGGATCCGTAAGTAACGGATATGCAAAAGTaaacaaa  
tttttaggcttttataaaaaataggaagcaggccggcggtAGATAAAAGAAGAATTCAAAGGCTGCA  
GCATTCAATATGAAGATTAATAACCTTGATTTAGATAATCTTCTTCGCCCTTAAGATCCTTAAT  
TTGGTAAAGGAACATAACAGCTTATACTACTCCTCCTACCTTTTCAACTAATCTGCAAGCTGCATC  
AGCAGTTCCACCAGTAGCTAGAATATCATCAACAATAACAACCTTTTTCACCTTTAGCTAAAGCATC  
ACTTTGAATTTCAAAAACATCCTTACCGTATTCTAAGTCGAATGAGAATTATTCAACCTTACCAGG  
TAGTTTGCCTTTCTTTCTGATTAAAATTAATCCCTTTCCATTTGTAAACCAATAGCGGTTCCAAA  
AATAAAACCTCTAGATTCTAAGATAACAATTTTATCAAAATCAATGTCCTTCAAAGCAATTACAAA  
AGCATCAGTAATACGCTTAAAAATGGCAGGATTAGAGAGGAGAGGAGCAATATCTTTAAAGATAAT

ACCAGGTTAAGGGAAATCAGGAATATTTCTGAAGTTTTCGCTAATAACTTTACCTATTTCTTAATT  
TTAGTAATCCCTGCAGGCGAACTGAATCGGTCAGCTAAACCAACCAATCAACATAATAAACTTTAT  
TATTTTTTACTTTAAGCATCTTACTGTTGTTGTAATAGTAGAGAAAGAAATACCCAATTAACCTTCATT  
CACATAACATTAATATCTATAAACATCTTTTTTCTCACATATATACAACCTCTCTAAATCAACAAAT  
AACTTTTTTAAAAATAATGGATATATATTAACAAAATAATATATCTCTTTTTTACAAAATAGTTCTTA  
TATAAATACGTATTCTGCACTCACCCGCATTTTTTCACAACAAAACATACCAAAAAAATTCTTACT  
TCTACATGTTTCCTTTCTTATTATTACAAAATTATTTTATAAATAGCATACAAAAATAAATACAAT  
AAAAAAATAAACAAAATCCTTTTTTATTTTGAATTATTTAAAAACAAATATTTTCAATCAATCAGTC  
AGTCAGCATAATATTAAAGCAACAAAACAAACCCAAGTTGTTTTTATAGTTTTTTTAATTGCTTTTC  
AGTACTATAAATAAATTTGTTATTACTTCAAGATTGATAAACTTCTTTTTTTAAATTAAATATCTAT  
GAATGAATAAATAAGTTGATATCTCTTTTTTAACTTGTTTTTCCTCTCTTTTACTTACTTGCCAATTT  
TTTTTTTTAAATTAAAGAAATATCTTTTTTATTTTTCAAAAACAAAATTTATTTTCCCTTGTATACAA  
AAACCCCTTTATTTAAATAAAATCTTTATGCCCATCAATAGCCACATCTTCTCGAGGGGGGGCCCG  
GTACCCAATTCGCCCTATAGTGAGTCGTATTACGCGCGCTCACTGGCCGTCGTTTTTACAACGTCGT  
GACTGGGAAAACCTGGCGTTACCCAACCTTAATCGCCTTGCAGCACATCCCCCTTTCGCCAGCTGG  
CGTAATAGCGAAGAGGCCCGCACCGATCGCCCTTCCCAACAGTTGCGCAGCCTGAATGGCGAATGG  
GACGCGCCCTGTAGCGGCGCATTAAGCGCGGCGGGTGTGGTGGTTACGCGCAGCGTGACCGCTACA  
CTTGCCAGCGCCCTAGCGCCCGCTCCTTTTCGCTTTCTTCCCTTCCTTTCTCGCCACGTTTCGCCGGC  
TTTCCCCGTCAAGCTCTAAATCGGGGGCTCCCTTTAGGGTTCCGATTTAGTGCTTTACGGCACCTC  
GACCCCAAAAACTTGATTAGGGTGATGGTTCACGTAGTGGGCCATCGCCCTGATAGACGGTTTTTT  
CGCCCTTTGACGTTGGAGTCCACGTTCTTTAATAGTGGACTCTTGTTCCAACTGGAACAACACTC  
AACCTATCTCGGTCTATTCTTTTGATTTATAAGGGATTTTGCCGATTTCGGCCTATTGGTTAAAA  
AATGAGCTGATTTAACAAAAATTTAACGCGAATTTTAACAAAATATTAACGCTTACAATTTAG
